# Supplementary material
Source: MDPI journal article supplement (https://www.mdpi.com/2073-4344/3/2/486)

# Supporting Information

**Figure S1.**  $^1\text{H}$  NMR spectrum with conversion yield of **3a** from integration. (Table 1, Entry 2). A mixture of **1a** (80 mg, 0.5 mmol), palladium(II) acetate (6 mg, 0.025 mmol), sodiumdiphenylphosphinobenzene-3-sulfonate (TPPMS, 18 mg, 0.05 mmol) and benzyl alcohol **2a** (154  $\mu\text{L}$ , 1.5 mmol) in  $\text{H}_2\text{O}$  (2 mL) was heated at 60  $^\circ\text{C}$  for 16 h in a sealed tube. After the reaction mixture was cooled, *p*-nitroanisole (38 mg, 0.25 mmol, internal standard) was added to the reaction mixture, which was extracted with AcOEt. The organic layer was washed with brine, and concentrated *in vacuo*. The residue was analyzed by  $^1\text{H}$ -NMR spectroscopy.

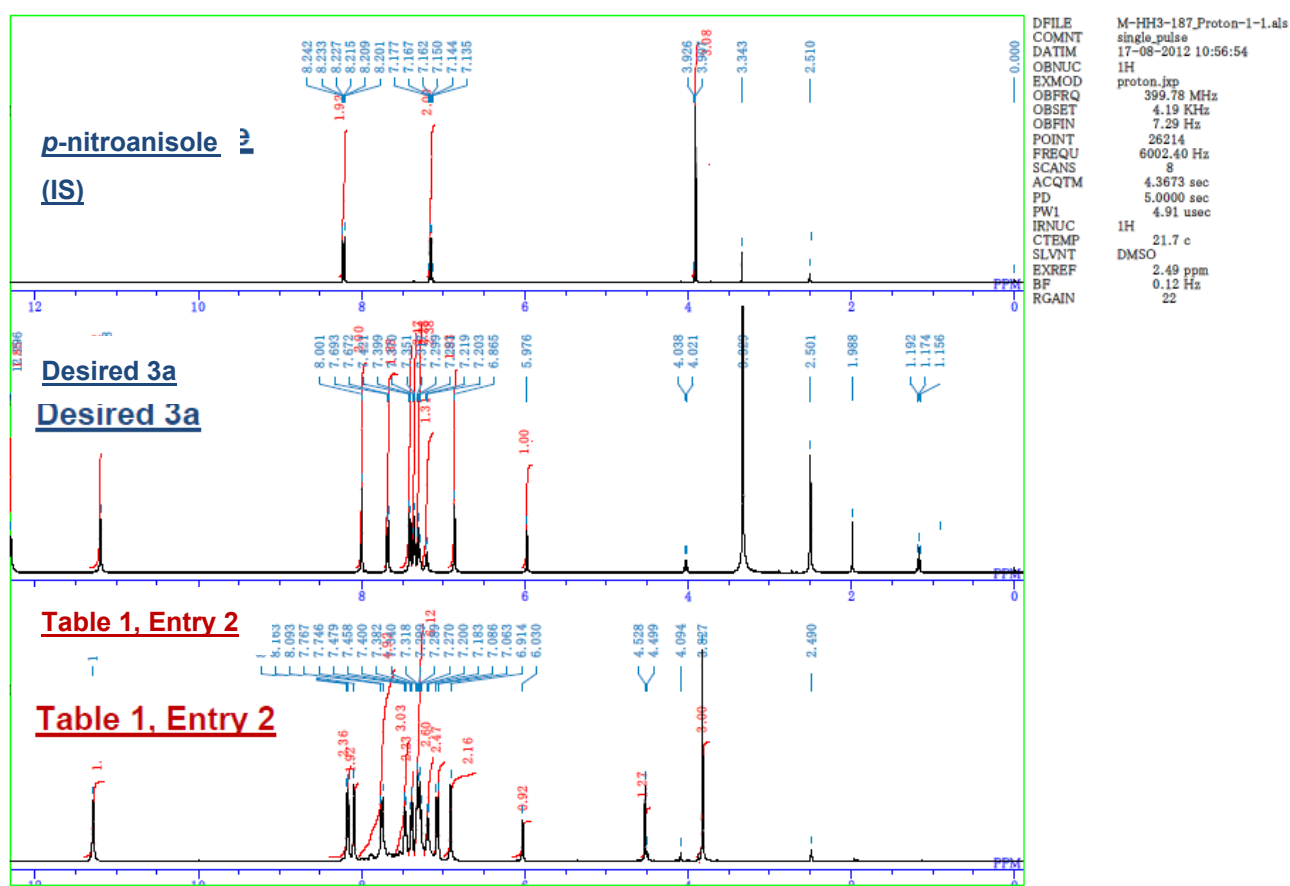

Conversion yield was calculated by integration.

|                  | desired 3a                | <i>p</i> -nitroanisole internal standard |
|------------------|---------------------------|------------------------------------------|
| Signal $\delta$  | 6.03 (methine- <b>H</b> ) | 3.827 (-O <b>CH</b> <sub>3</sub> )       |
| Integral value   | 0.92 (1H)                 | 3.00 (3H)                                |
| Calculated ratio | 92% from <b>1a</b>        |                                          |

**Figure S2.**  $^1\text{H-NMR}$  spectrum of C–H bond Activation at the C3-position of indole **1a** (Table 2). A mixture of **1a** (40 mg, 0.25 mmol), palladium(II) acetate (2.8 mg, 0.0125 mmol) or tris(dibenzylideneacetone)-dipalladium(0)-chloroform adduct (6.5 mg, 0.0063 mmol), sodium diphenylphosphinobenzene-3-sulfonate (TPPMS, 9.1 mg, 0.025 mmol) and benzyl alcohol **2** (0.75 mmol) in  $\text{D}_2\text{O}$  (0.75 mL) was heated at 60 °C for 3 h under Ar in a sealed tube. After cooling, the reaction mixture was extracted with AcOEt. The organic layer was washed with brine and concentrated *in vacuo*. The residue was analyzed by  $^1\text{H-NMR}$  spectroscopy. (A) entries 1-5; (B) entry 6 and 7.

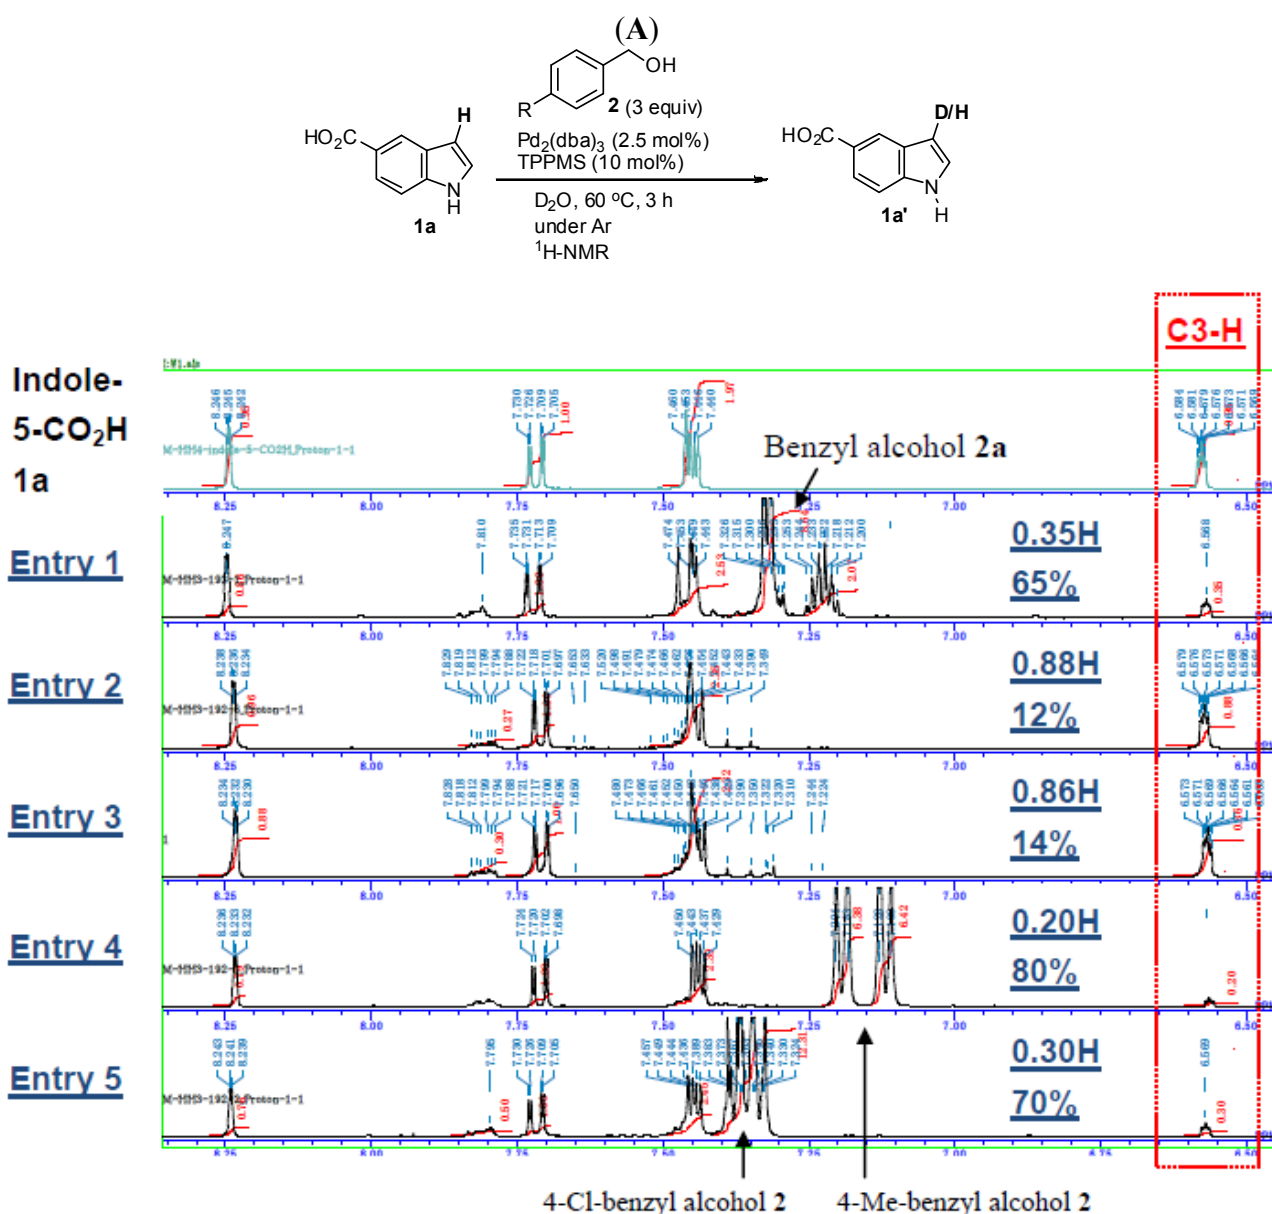

Figure S2. Cont.

(B)

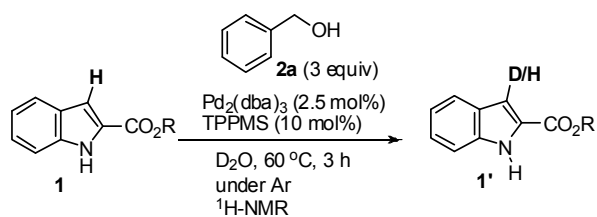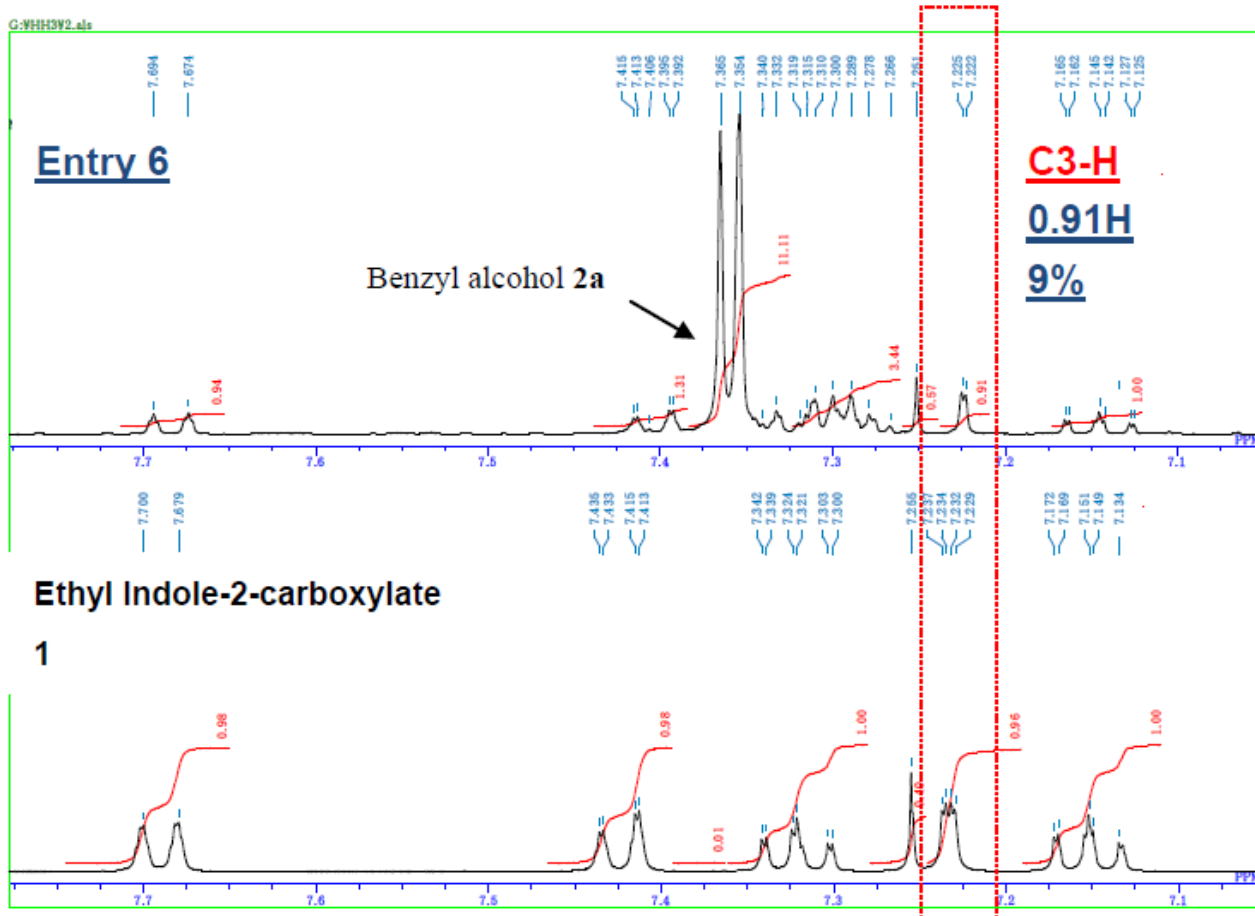

**Figure 3S.** <sup>1</sup>H NMR experiments to monitor the reaction. **(1)** Scheme 3 A. A mixture of 3-benzylated **4a** (7.8 mg, 0.031 mmol), **1a** (10.0 mg, 0.062 mmol), palladium(II) acetate (1.4 mg, 0.00624 mmol), sodium diphenylphosphinobenzene-3-sulfonate (TPPMS, 4.5 mg, 0.0125 mmol) and benzyl alcohol **2a** (20.1 mg, 0.186 mmol) in H<sub>2</sub>O (0.5 mL) was heated at 60 °C for 16 h in a sealed tube. After the reaction mixture was cooled, *p*-nitroanisole (4.7 mg, 0.031 mmol, internal standard) was added to the reaction mixture, which was extracted with AcOEt. The organic layer was washed with brine and concentrated *in vacuo*. The residue was analyzed by <sup>1</sup>H-NMR spectroscopy. **(2)** Scheme 3B.

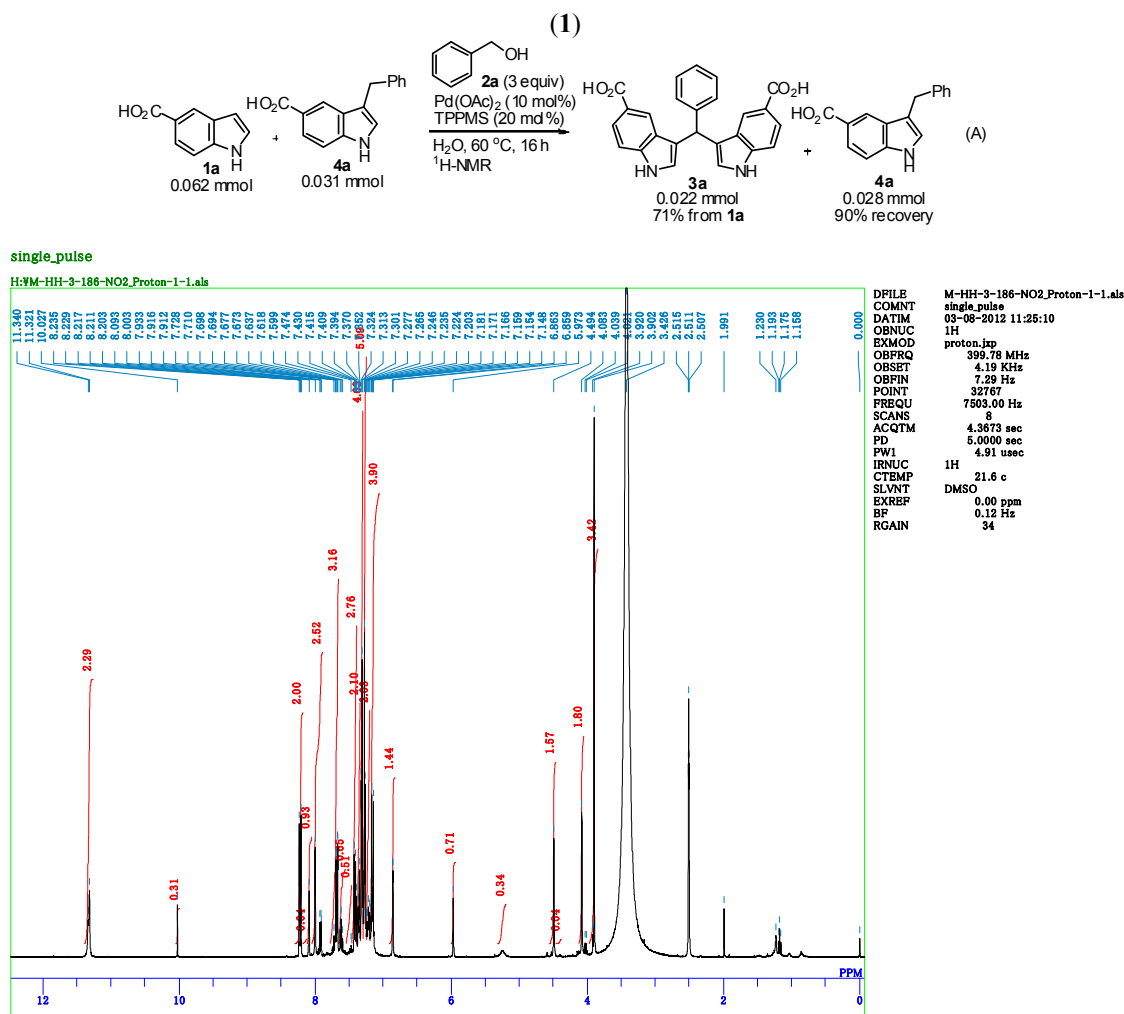

Conversion yield and recovery were calculated by integration.

|                  | desired <b>3b</b>                | 3-benzylated <b>4b</b>          | <i>p</i> -nitroanisole internal standard |
|------------------|----------------------------------|---------------------------------|------------------------------------------|
| Signal $\delta$  | 5.97<br>(methine- <b>H</b> )     | 4.08 ( <b>CH</b> <sub>2</sub> ) | 8.21 (Ar- <b>H</b> x2)                   |
| Integral value   | 0.71 (1H)                        | 1.80 (2H)                       | 2.0 (2H), 4.7 mg (0.031 mmol)            |
| Calculated ratio | 0.022 mmol<br>71% from <b>1b</b> | 0.028 mmol<br>90% recovery      |                                          |



Figure 3S. Cont.

Conversion yield and recovery were calculated by integration.

|                  | desired 3a                   | 3-benzylated 4b                 | <i>p</i> -nitroanisole internal standard |
|------------------|------------------------------|---------------------------------|------------------------------------------|
| Signal $\delta$  | 6.00<br>(methine- <u>H</u> ) | 4.06 ( <u>CH</u> <sub>2</sub> ) | 3.88 ( <u>OCH</u> <sub>3</sub> )         |
| Integral value   | 0.74 (1H)                    | 3.61 (2H)                       | 3.0 (3H), 77 mg (0.5 mmol)               |
| Calculated ratio | 0.37 mmol<br>74% from 1a     | 0.9 mmol<br>90% recovery        |                                          |

Figure 4S. <sup>1</sup>H-NMR spectrum (Table 3 Use of benzyl acetate 12).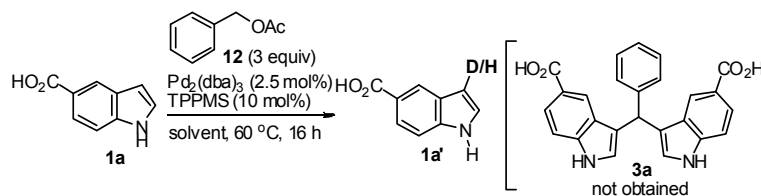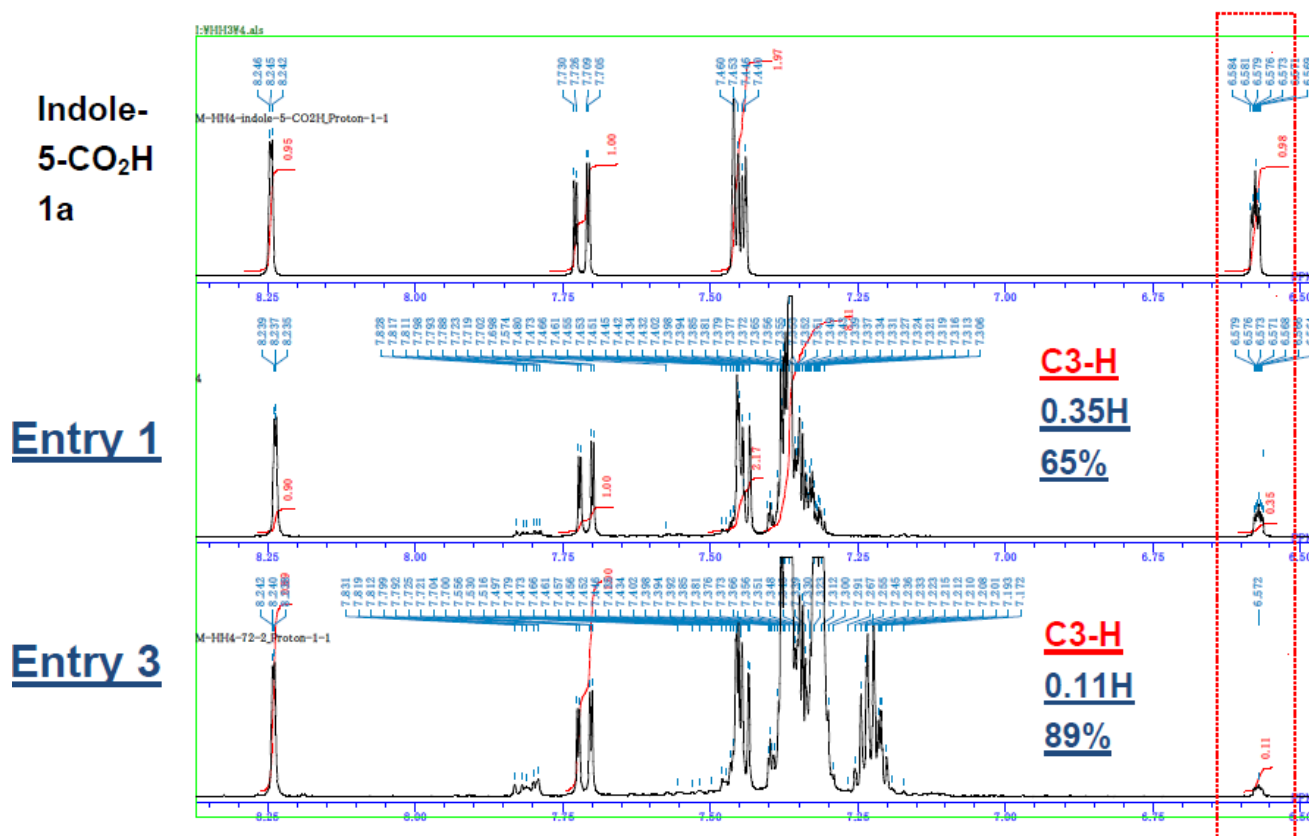

**Figure 5S.** (1) Scheme 5 A  $^1\text{H}$  NMR experiments to monitor the reaction. A mixture of 5-methoxyindole **12** (74 mg, 0.5 mmol), benzyl alcohol **2a** (162 mg, 1.5 mmol),  $\text{Pd}_2(\text{dba})_3\text{-CHCl}_3$  (12.9 mg, 0.0125 mmol), and sodium diphenylphosphinobenzene-3-sulfonate (TPPMS, 18 mg, 0.05 mmol) in  $\text{H}_2\text{O}$  (0.5 mL) was heated at  $60^\circ\text{C}$  for 16 h in a sealed tube under Ar. After the reaction mixture was cooled, *p*-nitroanisole (38.3 mg, 0.25 mmol, internal standard) was added to the reaction mixture, which was extracted with  $\text{CHCl}_3$  (8 mL), before the organic layer was analyzed by  $^1\text{H}$ -NMR spectroscopy. (2) Scheme 5 B. A mixture of benzyl alcohol **2a** (162 mg, 1.5 mmol),  $\text{Pd}_2(\text{dba})_3\text{-CHCl}_3$  (12.9 mg, 0.0125 mmol), and sodium diphenylphosphinobenzene -3-sulfonate (TPPMS, 18 mg, 0.05 mmol) in  $\text{H}_2\text{O}$  (0.5 mL) was heated at  $60^\circ\text{C}$  for 16 h in a sealed tube under Ar. After the reaction mixture was cooled, *p*-nitroanisole (230 mg, 1.5 mmol, internal standard) was added to the reaction mixture, which was extracted with  $\text{CHCl}_3$  (8 mL), before the organic layer was analyzed by  $^1\text{H}$ -NMR spectroscopy.

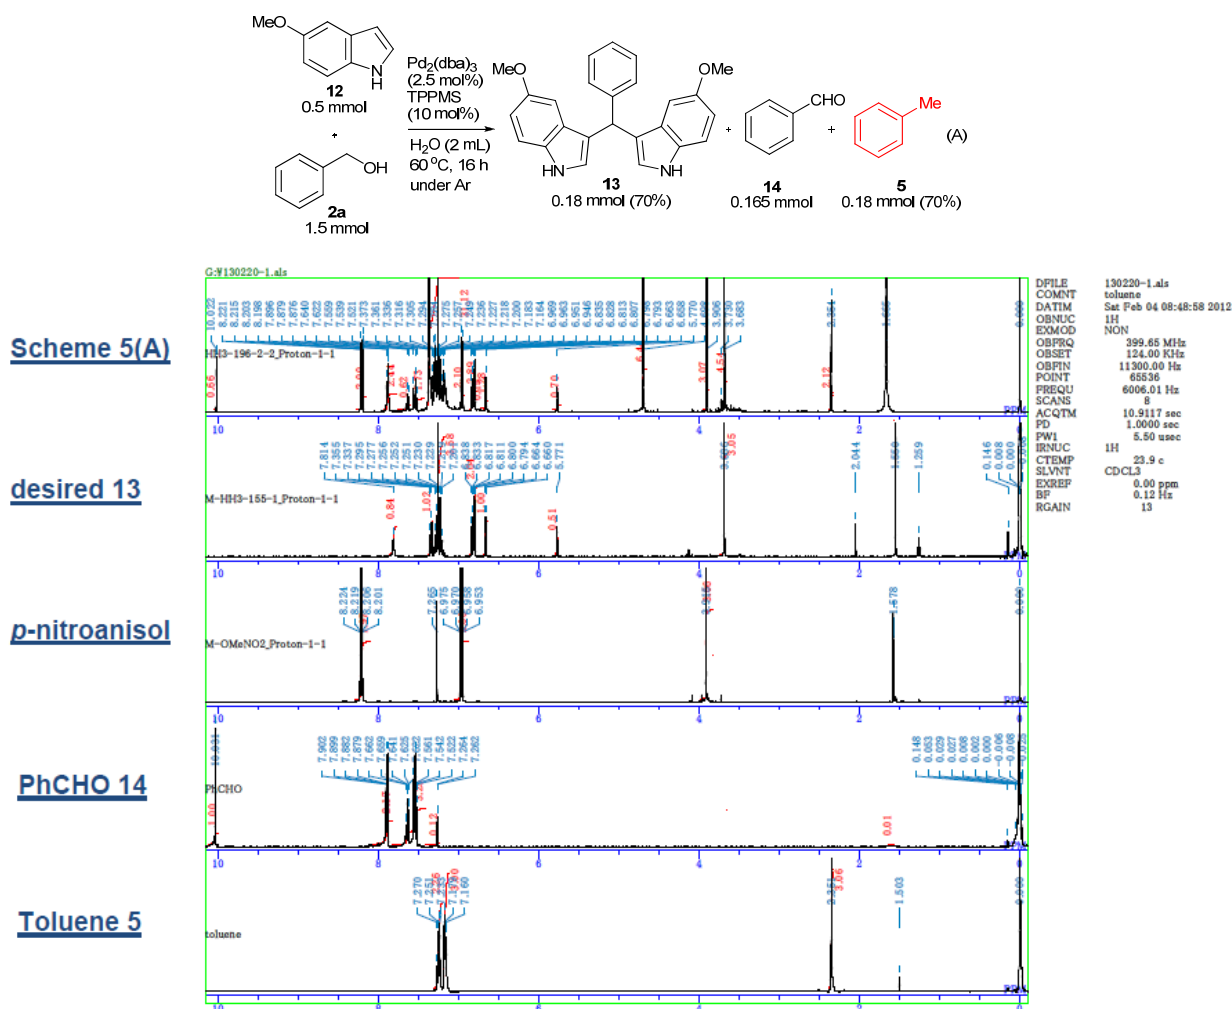

|                  | <b>desired 13</b>         | <b>Benzaldehyde 14</b> | <b>toluene 5</b>                | <b><i>p</i>-nitroanisole IS</b> |
|------------------|---------------------------|------------------------|---------------------------------|---------------------------------|
| Signal $\delta$  | 5.77 (methine- <u>H</u> ) | 10.0 (CHO)             | 2.35 ( <u>CH</u> <sub>3</sub> ) | 8.21 (Ar- <u>H</u> )            |
| Integral value   | 0.70 (1H)                 | 0.66 (1H)              | 2.12 (3H)                       | 2.0 (2H), 38.3 mg (0.25 mmol)   |
| Calculated ratio | 0.18 mmol, 70%            | 0.165 mmol             | 0.18 mmol, 70%                  |                                 |

Figure 5S. Cont.

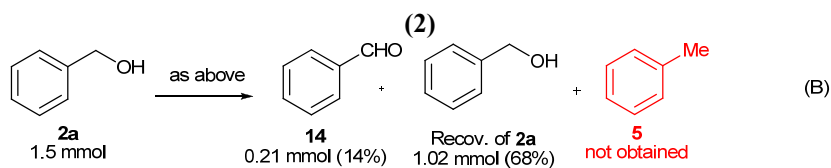

Scheme 5(B)

*p*-nitroanisol

PhCHO 14

Toluene 5

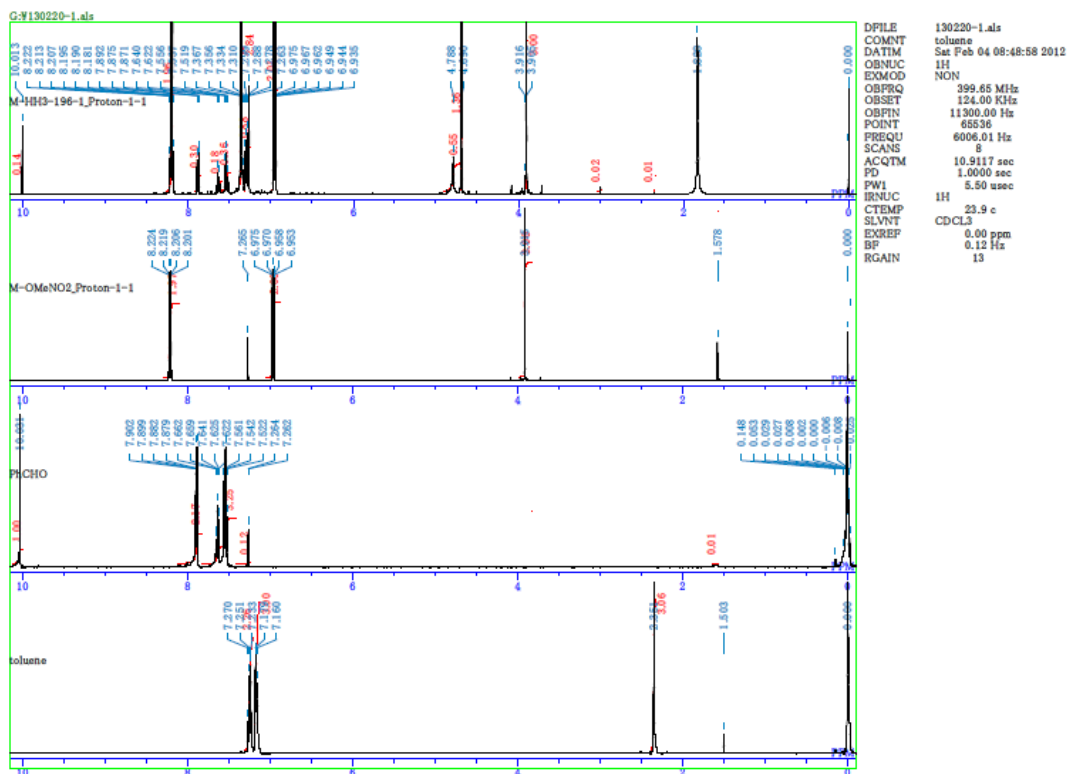

Conversion yield and recovery were calculated by integration.

|                  | benzaldehyde<br>14         | toluene 5                  | recov. of 2a               | <i>p</i> -nitroanisole IS   |
|------------------|----------------------------|----------------------------|----------------------------|-----------------------------|
| Signal $\delta$  | 10.0 (CH $\underline{O}$ ) | 2.35 (CH $\underline{3}$ ) | 4.69 (CH $\underline{2}$ ) | 3.91 (OCH $\underline{3}$ ) |
| Integral value   | 0.14 (1H)                  | 0.01 (3H)                  | 1.36 (2H)                  | 3.0 (3H), 230 mg (1.5 mmol) |
| Calculated ratio | 0.21 mmol, 14%             | 0%                         | 1.02 mmol, 68%             |                             |



**Figure 6S.**  $^1\text{H-NMR}$  spectrum with product ratio calculation from integration. (Scheme 6. Pd-catalyzed reaction with benzyl- $\alpha,\alpha\text{-}d_2$  alcohol 15). A mixture of 5-methoxyindole 12 (37 mg, 0.25 mmol), benzyl- $\alpha,\alpha\text{-}d_2$  alcohol 15 (81 mg, 0.75 mmol),  $\text{Pd}(\text{OAc})_2$  (3 mg, 0.0125 mmol), and sodium diphenylphosphinobenzene-3-sulfonate (TPPMS, 9 mg, 0.025 mmol) in  $\text{H}_2\text{O}$  (1.0 mL) was heated at  $60\text{ }^\circ\text{C}$  for 16 h in a sealed tube under Ar. After cooling, the reaction mixture was extracted with  $\text{CHCl}_3$  (8 mL). The organic layer was subsequently analyzed by  $^1\text{H-NMR}$  spectroscopy.

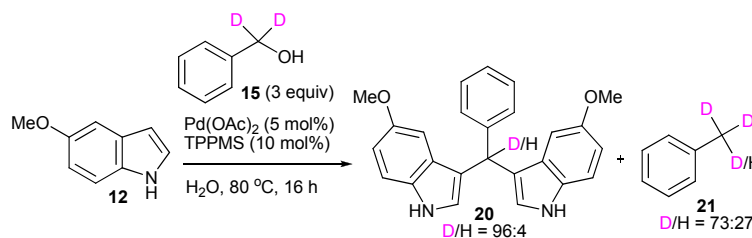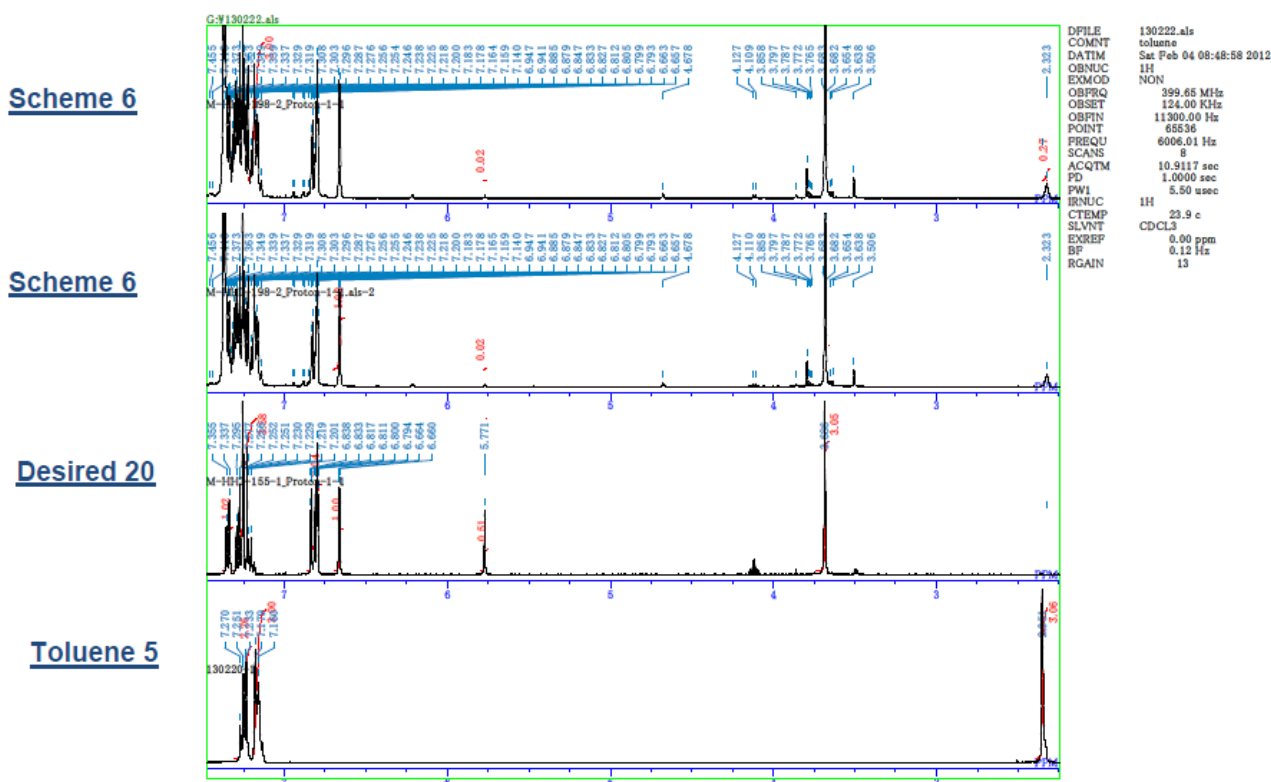

Conversion yield and recovery were calculated by integration.

|                  | desired 20                   |                      | toluene 5                       |                             |
|------------------|------------------------------|----------------------|---------------------------------|-----------------------------|
| Signal $\delta$  | 5.77<br>(methine- <u>H</u> ) | 6.66 (Ar- <u>H</u> ) | 2.32 ( <u>CH</u> <sub>3</sub> ) | 7.15-7.2<br>(Ar- <u>H</u> ) |
| Integral value   | 0.02 (1H)                    | 1.00 (2H)            | 0.27 (1H)                       | 3.0 (3H)                    |
| Calculated ratio | 4%                           |                      | 27%                             |                             |

Figure 7S. Copies of <sup>1</sup>H and <sup>13</sup>C NMR spectra.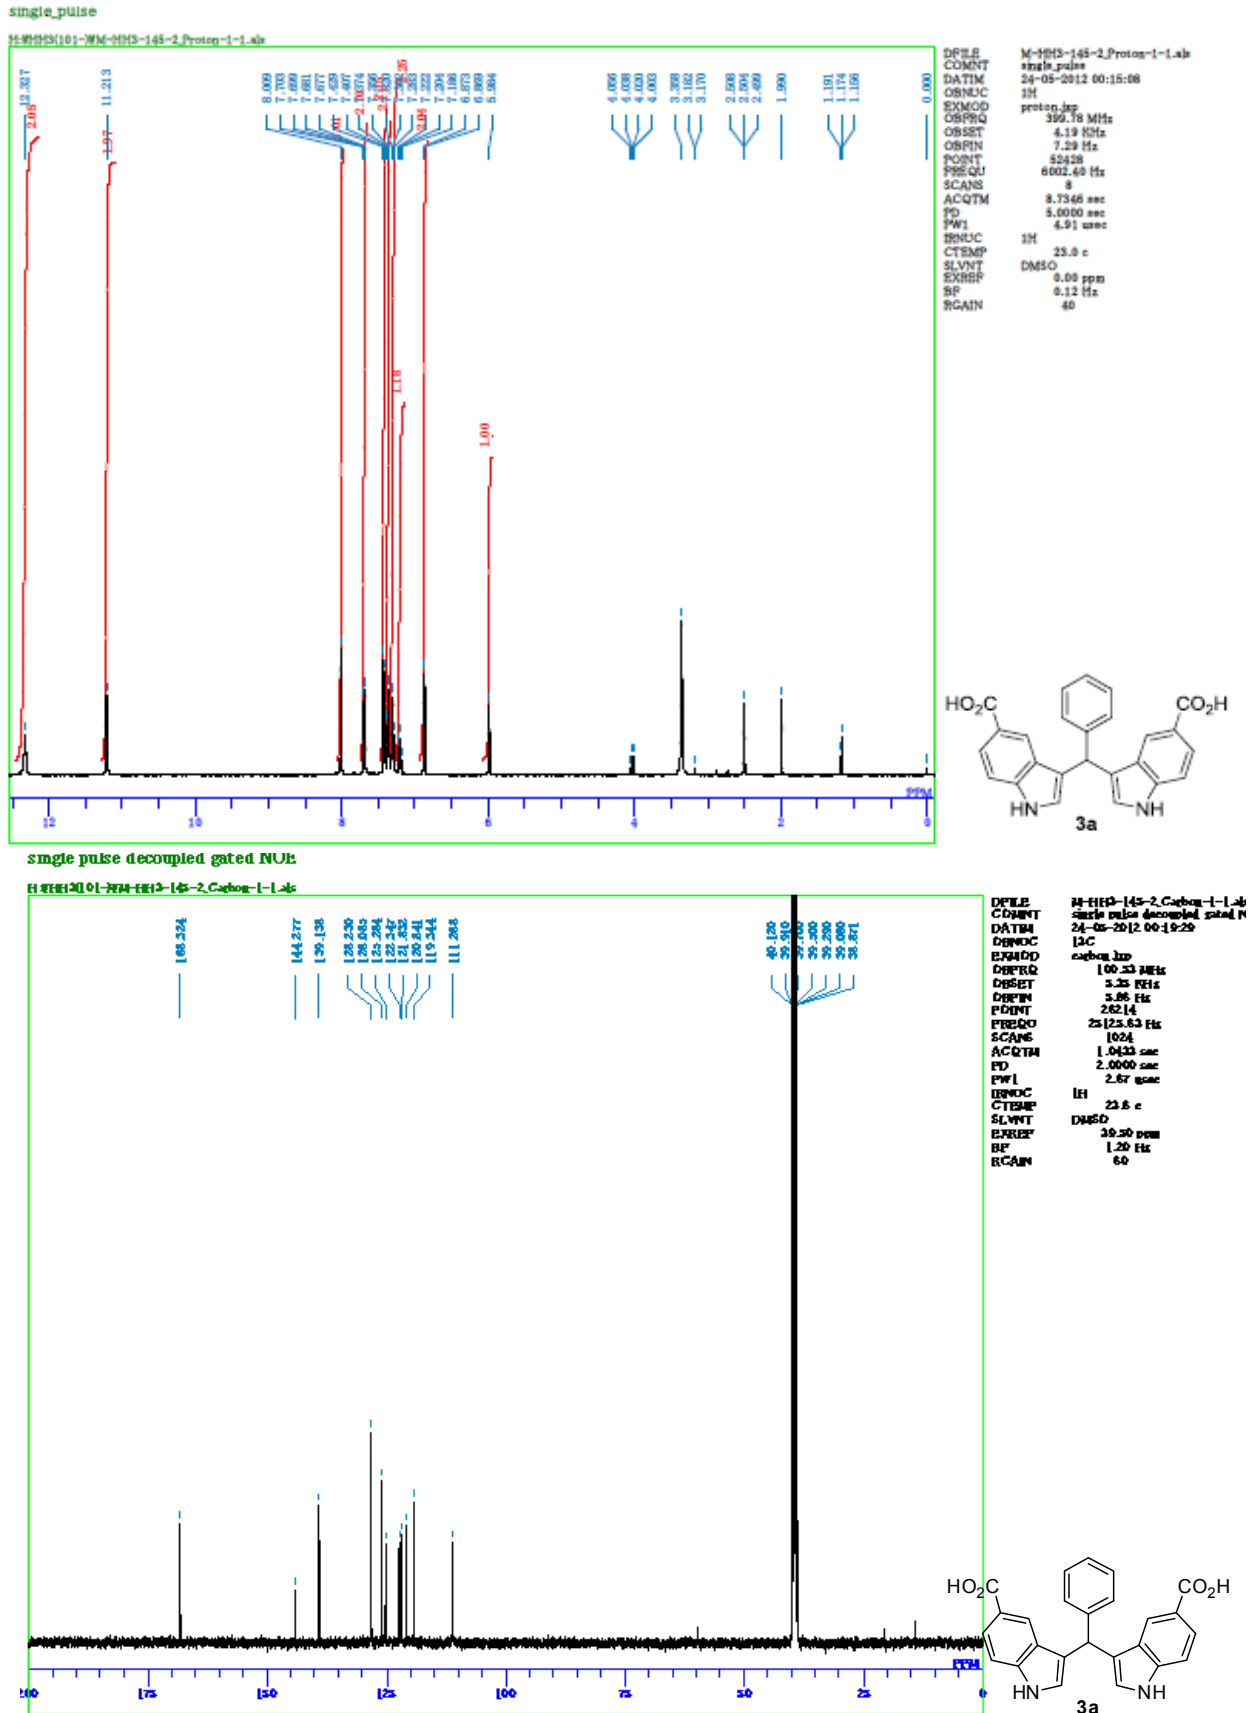

Figure 7S. Cont.

single\_pulse

M-HHS(101)-MM-1013-151-1-2,Proton-1-1.als

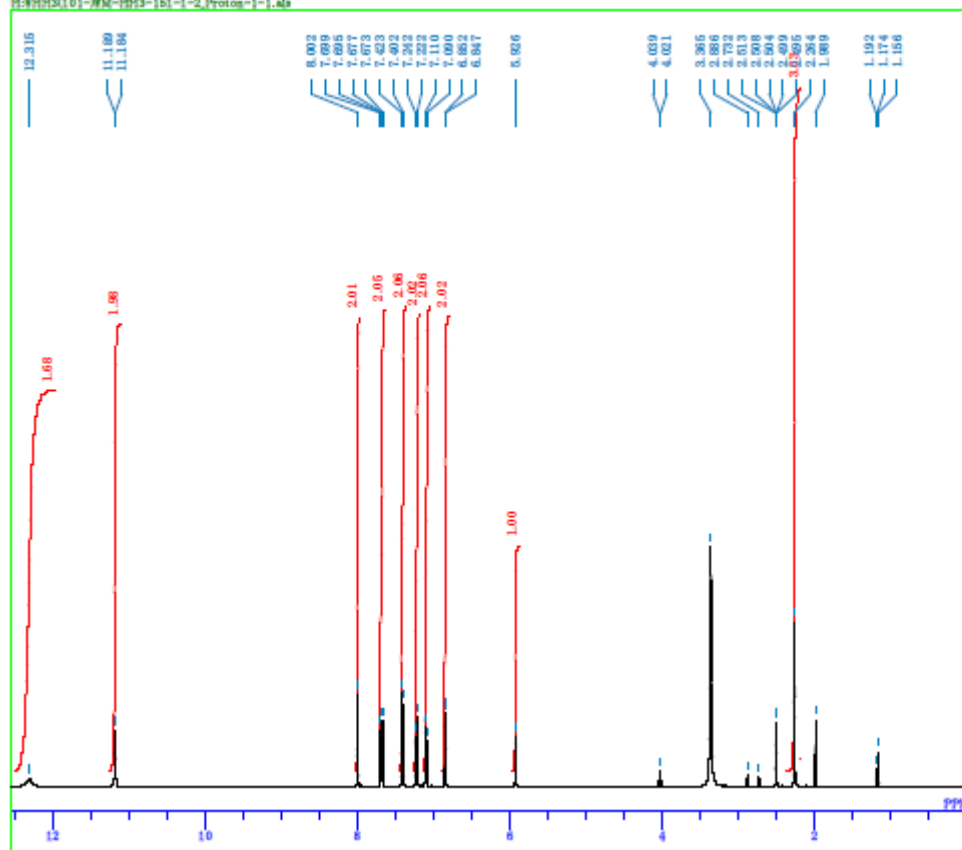

DFILE M-HHS-151-1-2,Proton-1-1.als  
 COMNT single\_pulse  
 DATIM 23-05-2012 07:08:19  
 OBNUC 1H  
 EXMOD proton\_jep  
 OBPRQ 399.78 MHz  
 OBSET 4.19 KHz  
 OBSPIN 7.28 Hz  
 POINT 52428  
 PRSQU 6002.40 Hz  
 SCANS 8  
 ACQTM 8.7346 sec  
 PD 5.0000 sec  
 PW1 4.91 usec  
 IRNUC 1H  
 CTMP 23.5 c  
 SLVNT DMSO  
 EXREF 0.00 ppm  
 SF 0.12 Hz  
 RGAIN 38

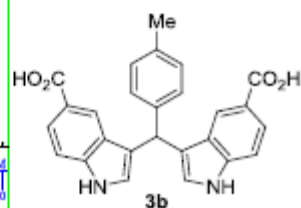

single pulse decoupled gated NOE

M-HHS(101)-MM-1013-151-1-2,Carbon-1-1.als

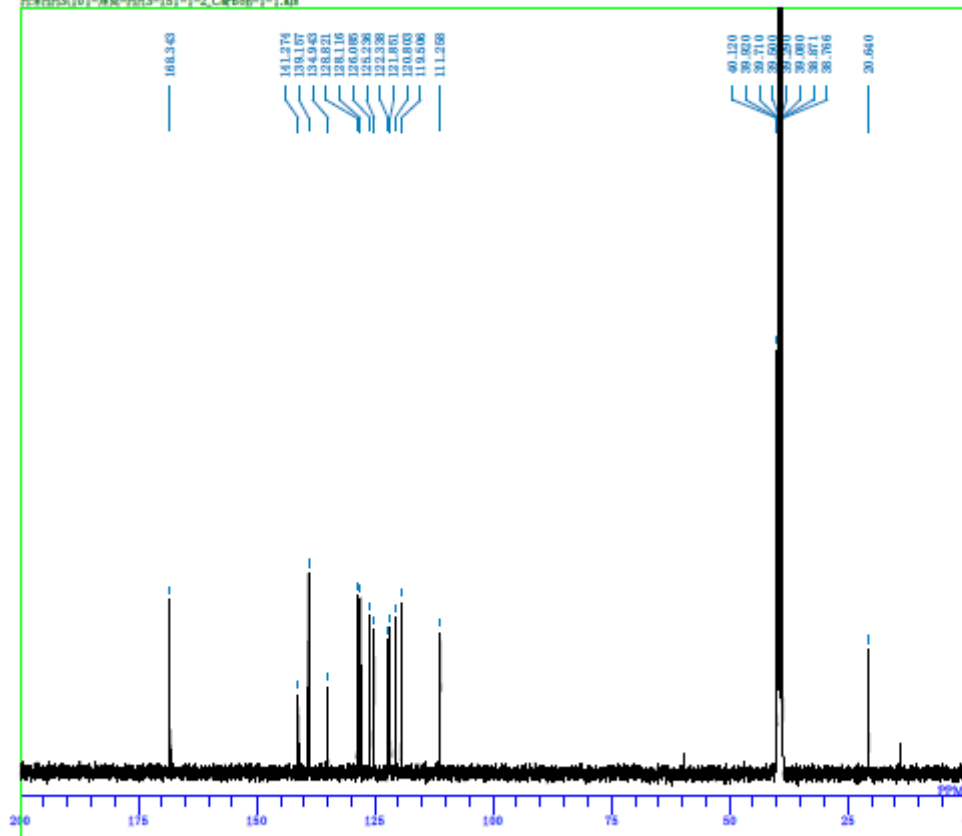

DFILE M-HHS-151-1-2,Carbon-1-1.als  
 COMNT single pulse decoupled gated NOE  
 DATIM 23-05-2012 07:12:42  
 OBNUC 13C  
 EXMOD carbon\_jep  
 OBPRQ 100.55 MHz  
 OBSET 5.35 KHz  
 OBSPIN 5.88 Hz  
 POINT 28214  
 PRSQU 25125.63 Hz  
 SCANS 1024  
 ACQTM 1.0435 sec  
 PD 2.0000 sec  
 PW1 2.67 usec  
 IRNUC 13C  
 CTMP 23.7 c  
 SLVNT DMSO  
 EXREF 39.50 ppm  
 SF 1.20 Hz  
 RGAIN 60

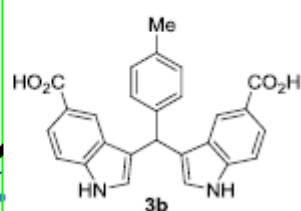

Figure 7S. Cont.

single\_pulse

M-19H3(101)-NM-19H3-154-4\_Proton-1-1.ac

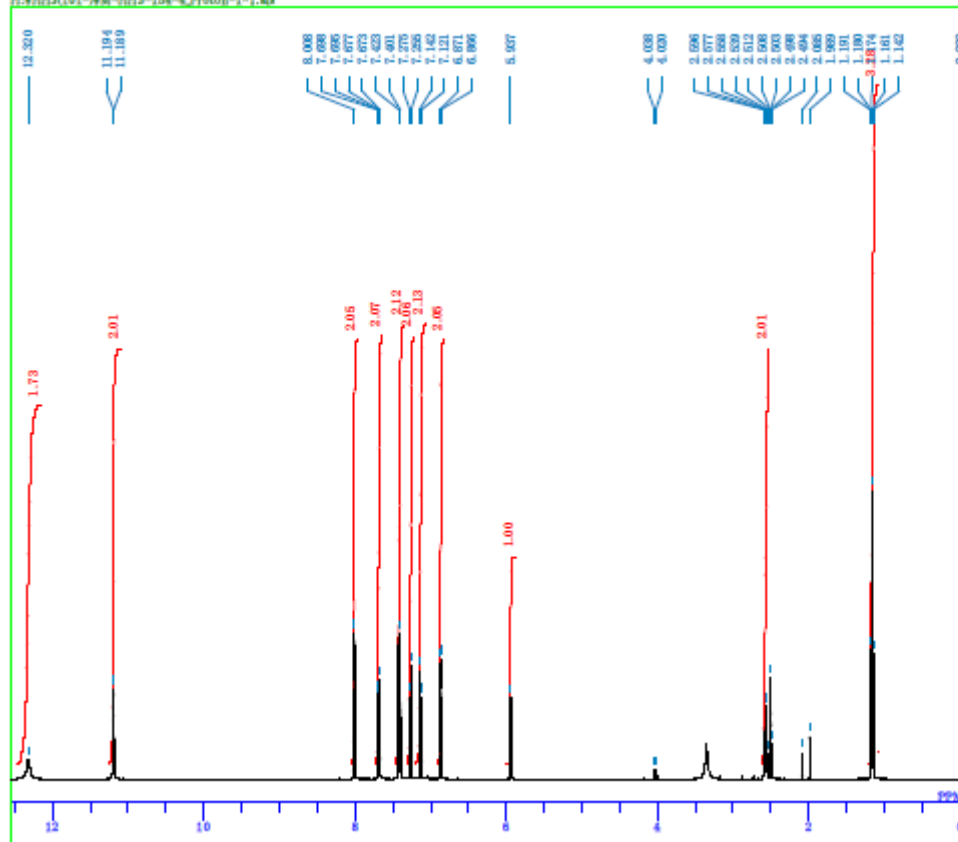

DFILE M-19H3-154-4\_Proton-1-1.ac  
 COMNT single\_pulse  
 DATIM 22-05-2012 23:22:60  
 OBNUC 1H  
 EXMOD proton\_jsp  
 OSFRQ 399.78 MHz  
 OSBST 4.19 KHz  
 OSBIN 7.29 Hz  
 POINT 52428  
 FREQU 4002.40 Hz  
 SCANS 9  
 ACQTM 8.7346 sec  
 PD 5.0000 sec  
 PW1 4.91 usec  
 IRNUC 1H  
 CTMPC 22.5 c  
 SLVNT DMSO  
 EXREF 0.30 ppm  
 SF 0.12 Hz  
 RGAIN 40

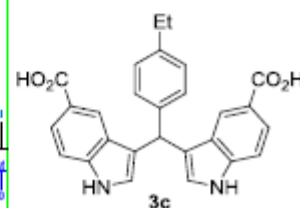

single\_pulse decoupled gated NOE

M-19H3(101)-NM-19H3-154-4\_Carbon-1-1.ac

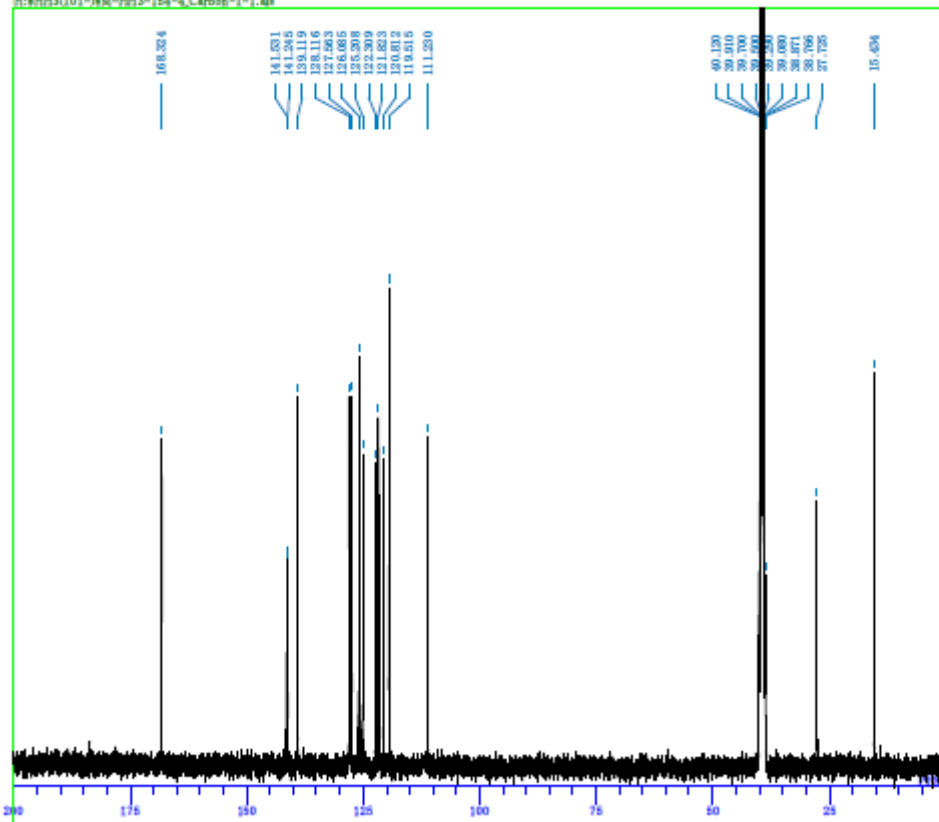

DFILE M-19H3-154-4\_Carbon-1-1.ac  
 COMNT single\_pulse decoupled gated NOE  
 DATIM 22-05-2012 23:27:22  
 OBNUC 13C  
 EXMOD carbon\_jsp  
 OSFRQ 100.63 MHz  
 OSBST 5.35 KHz  
 OSBIN 5.86 Hz  
 POINT 24214  
 FREQU 25125.63 Hz  
 SCANS 2048  
 ACQTM 1.9433 sec  
 PD 2.0000 sec  
 PW1 2.67 usec  
 IRNUC 13C  
 CTMPC 23.8 c  
 SLVNT DMSO  
 EXREF 39.59 ppm  
 SF 1.20 Hz  
 RGAIN 40

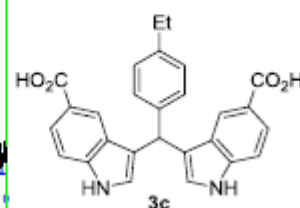

Figure 7S. Cont.

single\_pulse

M-1013-151-3,Proton-1-1.ala

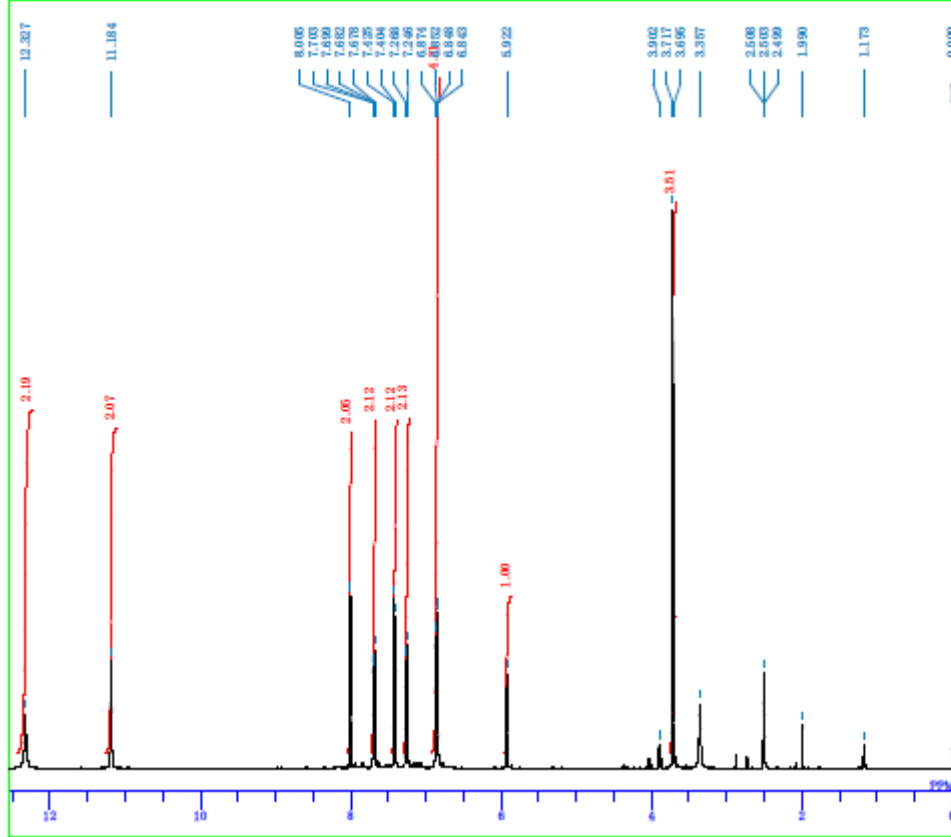

DFILE M-1013-151-3,Proton-1-1.ala  
 COMNT single\_pulse  
 DATIM 22-05-2012 19:11:31  
 ORNUC 1H  
 EXMOD proton\_cp  
 OBPRQ 399.78 MHz  
 OBSST 4.19 KHz  
 OBRIN 7.29 Hz  
 POINT 52428  
 FREQU 6002.40 Hz  
 SCANS 8  
 ACQTM 8.7546 sec  
 PD 5.0000 sec  
 PW1 4.91 usec  
 IRNUC 1H  
 CTEMP 23.7 c  
 SLVNT DMSO  
 EXREF 0.00 ppm  
 BP 0.12 Hz  
 RGAIN 38

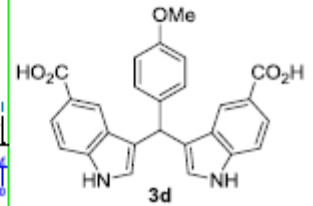

single pulse decoupled gated NOE

M-1013-151-3,Carbon-1-1.ala

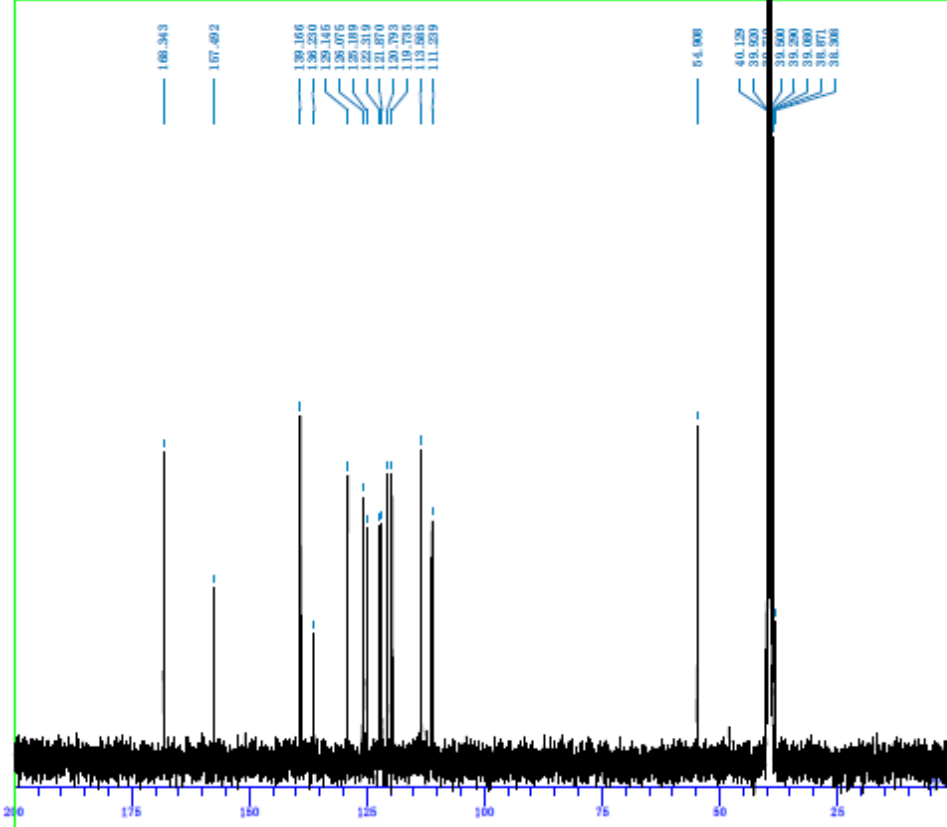

DFILE M-1013-151-3,Carbon-1-1.ala  
 COMNT single\_pulse decoupled gated NOE  
 DATIM 22-05-2012 19:15:51  
 ORNUC 13C  
 EXMOD carbon\_cp  
 OBPRQ 100.63 MHz  
 OBSST 5.35 KHz  
 OBRIN 5.86 Hz  
 POINT 28214  
 FREQU 25125.43 Hz  
 SCANS 304  
 ACQTM 1.0433 sec  
 PD 2.0000 sec  
 PW1 2.47 usec  
 IRNUC 13C  
 CTEMP 22.5 c  
 SLVNT DMSO  
 EXREF 39.50 ppm  
 BP 1.20 Hz  
 RGAIN 60

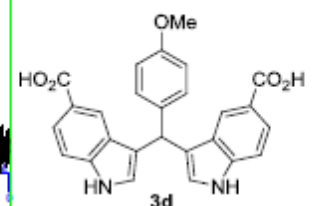

Figure 7S. Cont.

single\_pulse

M-1913-153-4, Proton-1-1.als

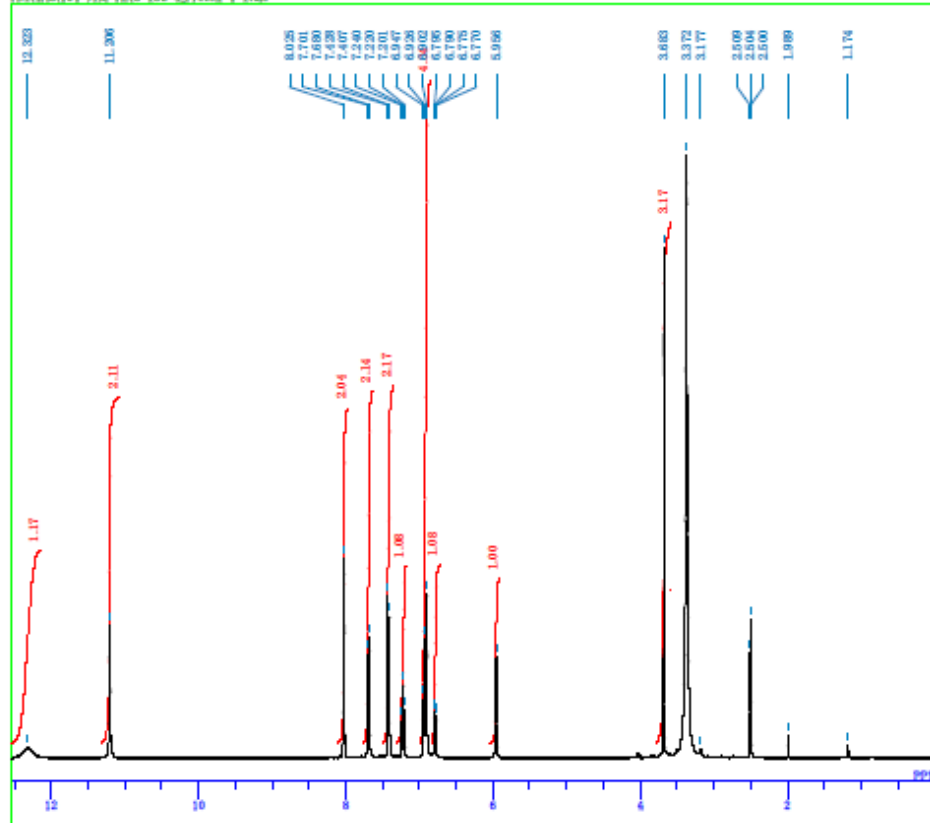

DPF15 M-1913-153-4, Proton-1-1.als  
 COMNT single\_pulse  
 DATIM 23-05-2012 01:16:16  
 OBNUC 1H  
 EXMOD proton\_jsp  
 OBPRQ 309.78 MHz  
 OBSET 4.19 KHz  
 OBPRN 7.29 Hz  
 POINT 22428  
 PRSQQU 4082.40 Hz  
 SCANS 8  
 ACQTM 8.7346 sec  
 PD 5.0000 sec  
 PW1 6.91 usec  
 IRNUC 1H  
 CTMP 23.8 c  
 SLVNT DMSO  
 EXRSP 0.00 ppm  
 BP 0.12 Hz  
 RGAIN 38

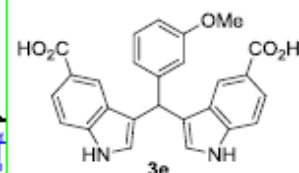

single pulse decoupled gated NOE

M-1913-153-4, Carbon-1-1.als

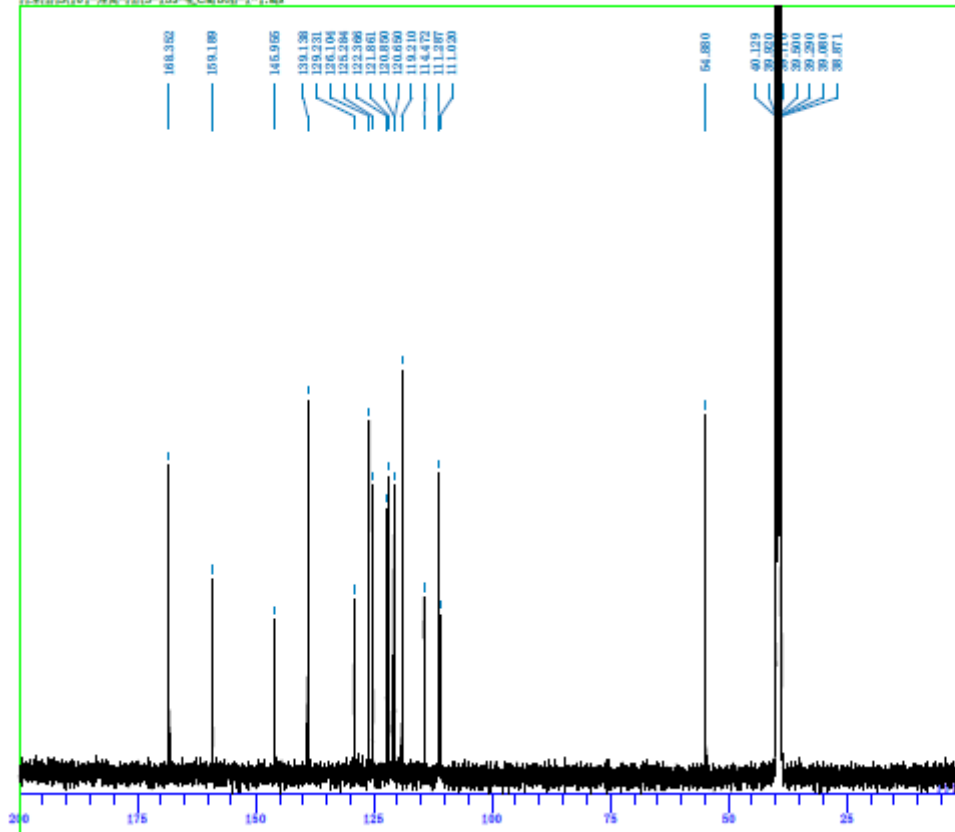

DPF15 M-1913-153-4, Carbon-1-1.als  
 COMNT single pulse decoupled gated NOE  
 DATIM 23-05-2012 01:20:42  
 OBNUC 13C  
 EXMOD carbon\_jsp  
 OBPRQ 130.35 MHz  
 OBSET 5.36 KHz  
 OBPRN 5.86 Hz  
 POINT 28214  
 PRSQQU 25125.63 Hz  
 SCANS 2048  
 ACQTM 1.9433 sec  
 PD 2.0000 sec  
 PW1 2.67 usec  
 IRNUC 13C  
 CTMP 23.0 c  
 SLVNT DMSO  
 EXRSP 39.50 ppm  
 BP 1.20 Hz  
 RGAIN 40

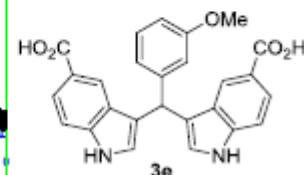

Figure 7S. Cont.

single\_pulse

M-1H13(101)-NM-1H13-151-2\_Proton-1-1.als

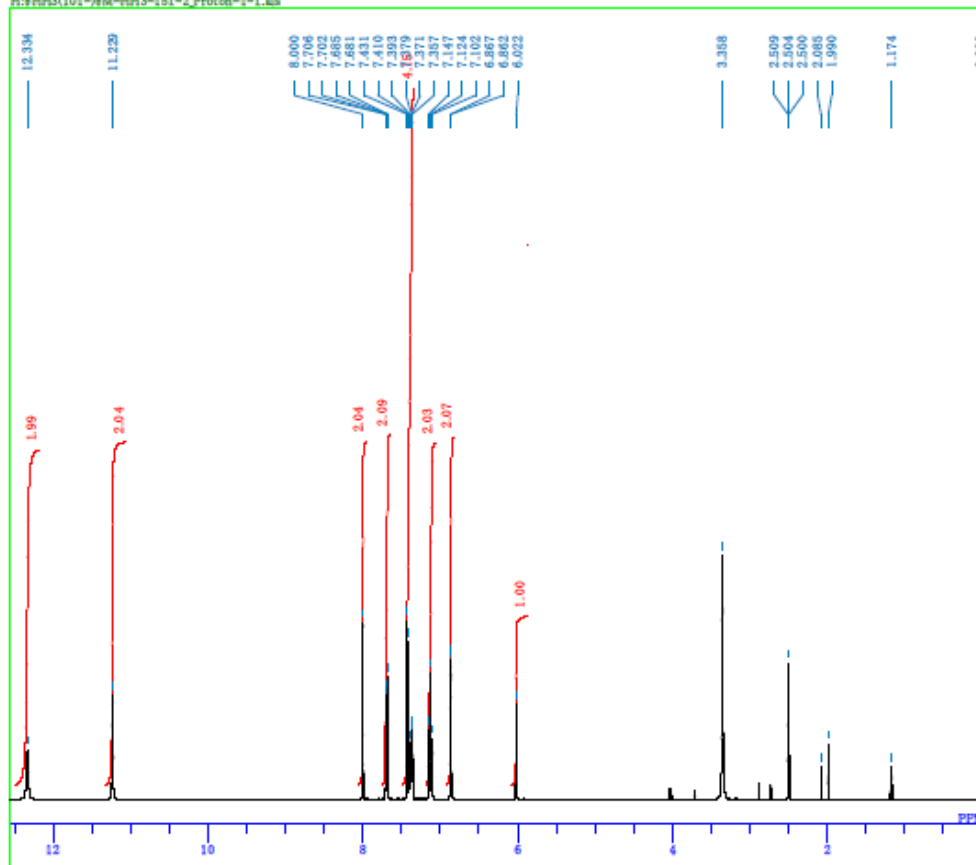

DPFILE M-1H13-151-2\_Proton-1-1.als  
 COMINT single\_pulse  
 DATIM 22-05-2012 19:36:21  
 1H  
 EXMOD proton\_jp  
 OBPRQ 399.78 MHz  
 OBSST 4.19 KHz  
 OBRIN 7.29 Hz  
 POINT 52428  
 PREQU 6002.40 Hz  
 SCANS 8  
 ACQTM 8.7346 sec  
 PD 5.0000 sec  
 PWI 4.91 usec  
 IRNUC 1H  
 CTMP 22.1 c  
 SLVNT DMSO  
 EXREF 0.00 ppm  
 BF 0.12 Hz  
 RGAIN 40

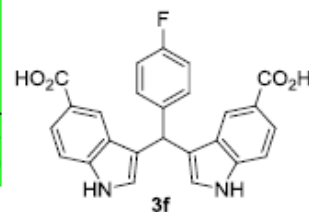

single pulse decoupled gated NOE

M-1H13(101)-NM-1H13-151-2\_Carbon-1-1.als

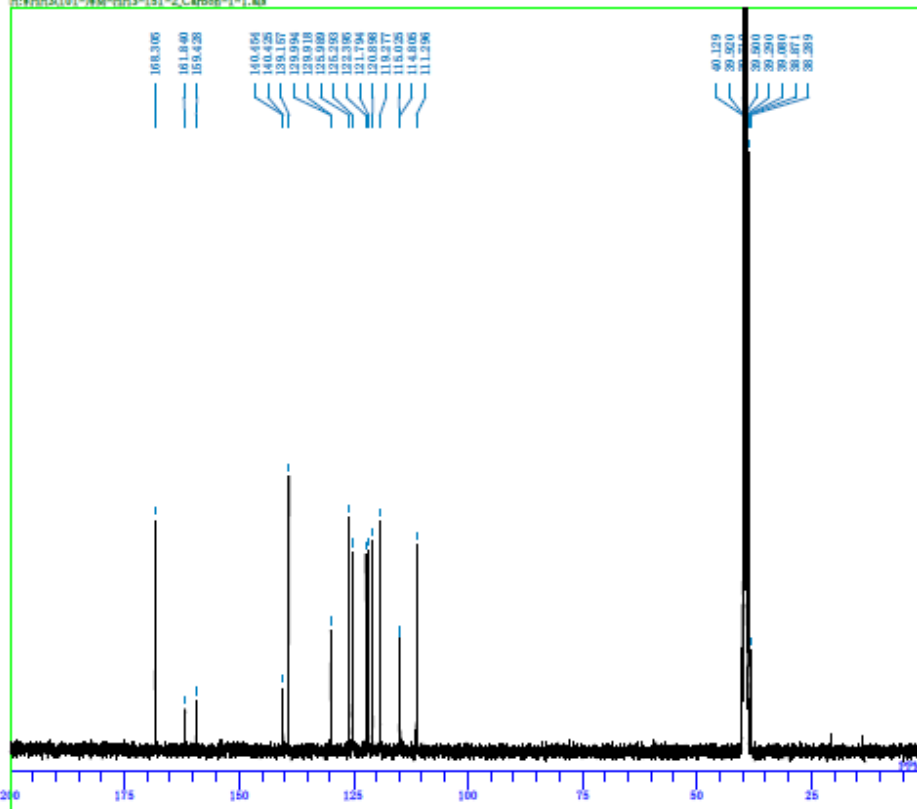

DPFILE M-1H13-151-2\_Carbon-1-1.als  
 COMINT single pulse decoupled gated NOE  
 DATIM 22-05-2012 19:40:43  
 13C  
 EXMOD carbon\_jp  
 OBPRQ 100.63 MHz  
 OBSST 5.35 KHz  
 OBRIN 5.86 Hz  
 POINT 28214  
 PREQU 25125.65 Hz  
 SCANS 2048  
 ACQTM 1.0433 sec  
 PD 2.0000 sec  
 PWI 2.67 usec  
 IRNUC 13H  
 CTMP 25.8 c  
 SLVNT DMSO  
 EXREF 39.50 ppm  
 BF 1.20 Hz  
 RGAIN 60

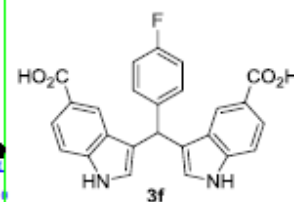

Figure 7S. Cont.

single\_pulse

M-1913-156-3-2\_Proton-1-1.a

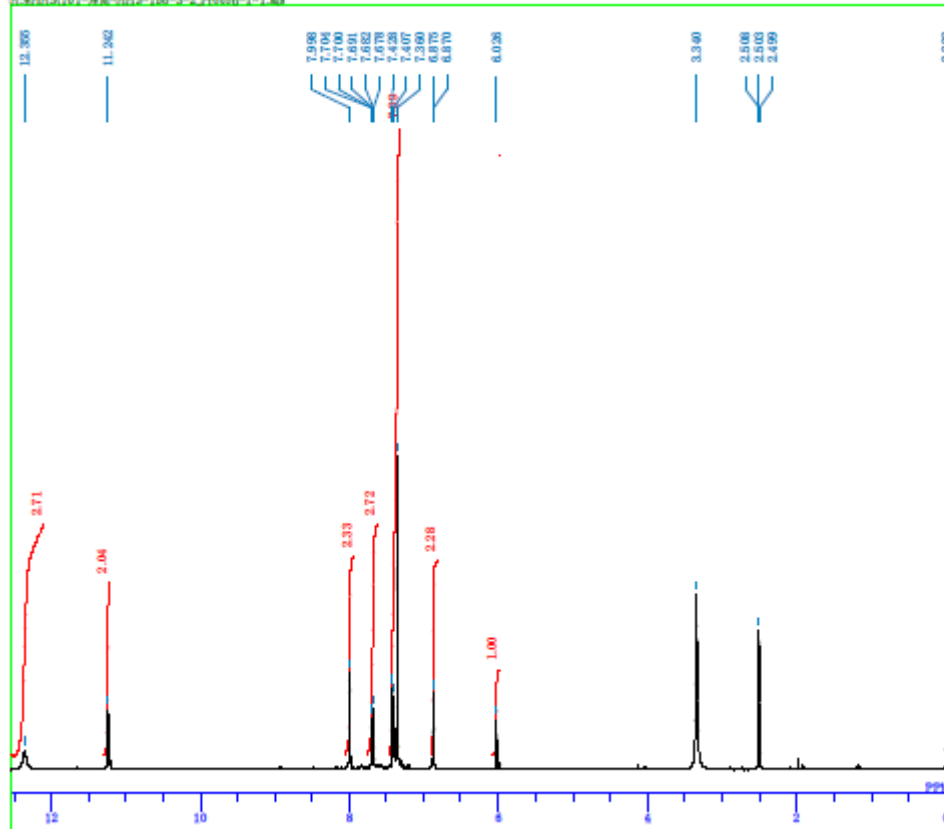

DFILE M-1913-156-3-2\_Proton-1-1.a  
 COMMENT single\_pulse  
 DATIM 06-06-2012 21:42:01  
 OBNUC 1H  
 EXMOD proton\_jsp  
 OBPRQ 399.78 MHz  
 OBSET 4.19 Hz  
 OBRIN 7.29 Hz  
 POINT 52428  
 PRBQU 6002.40 Hz  
 SCANS 8  
 ACQTM 8.7346 sec  
 PD 5.0000 sec  
 PW1 6.91 umc  
 OBNUC 1H  
 CTMP 22.8 c  
 SLVNT DMSO  
 EXREF 0.00 ppm  
 BF 0.12 Hz  
 RGAIN 44

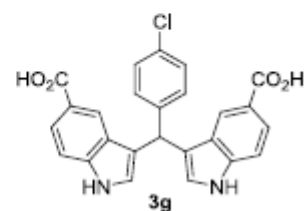

single pulse decoupled gated NOE

M-1913-156-3-2\_Carbon-1-1.a

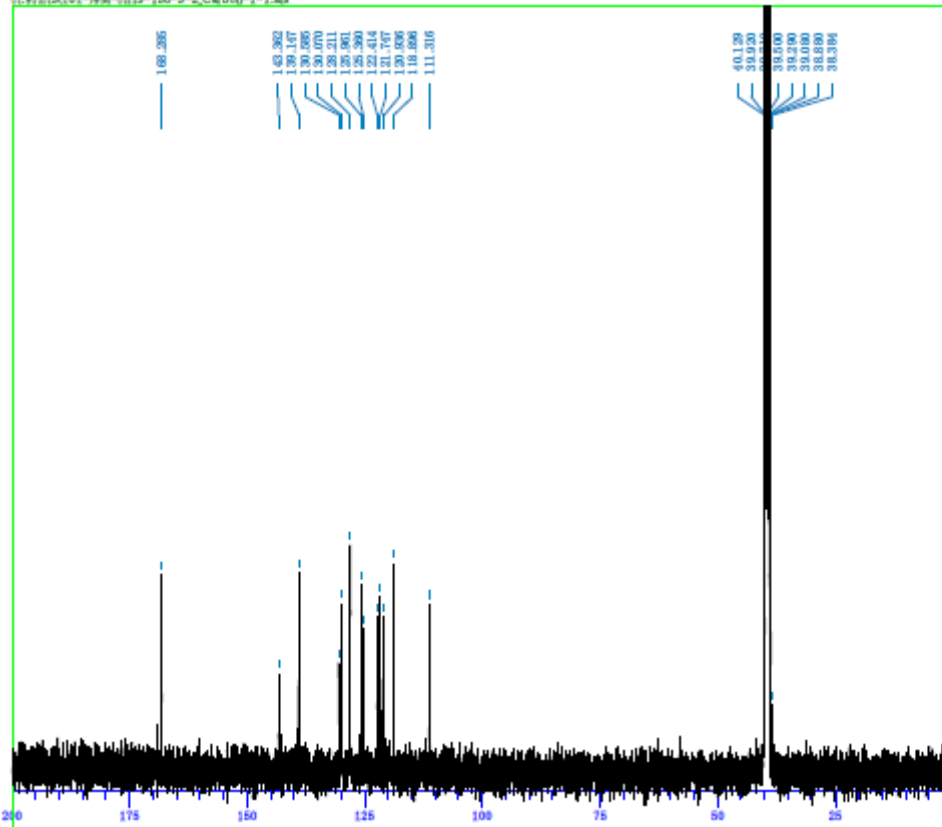

DFILE M-1913-156-3-2\_Carbon-1-1.a  
 COMMENT single pulse decoupled gated NOE  
 DATIM 06-06-2012 21:46:25  
 OBNUC 13C  
 EXMOD carbon\_jsp  
 OBPRQ 100.55 MHz  
 OBSET 5.36 Hz  
 OBRIN 262.14 Hz  
 POINT 25125.63 Hz  
 SCANS 1024  
 ACQTM 1.9435 sec  
 PD 2.0000 sec  
 PW1 2.67 umc  
 OBNUC 1H  
 CTMP 23.6 c  
 SLVNT DMSO  
 EXREF 39.50 ppm  
 BF 1.20 Hz  
 RGAIN 60

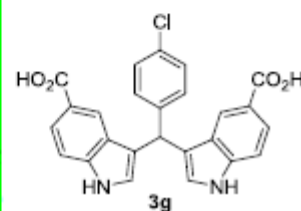



Figure 7S. Cont.

single\_pulse

M-1953-154-2,Proton-1-1.als

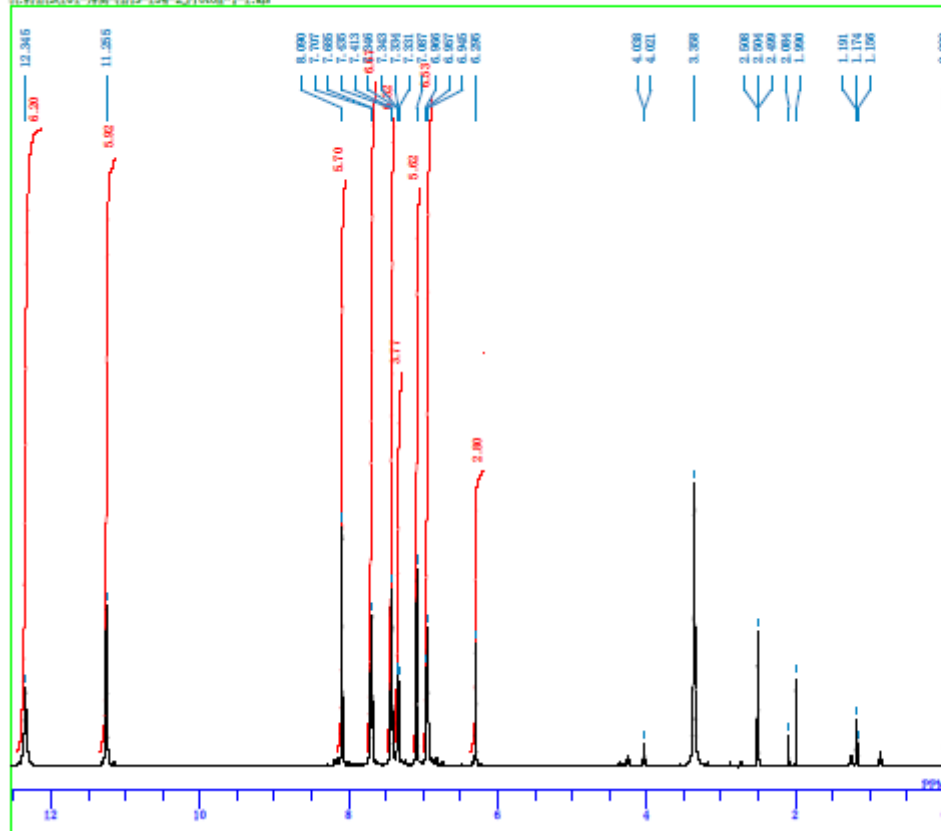

DPFILE M-1953-154-2,Proton-1-1.als  
 COMMENT single\_pulse  
 DATIM 23-05-2012 06:07:01  
 OBNUC 1H  
 EXMOD proton\_jap  
 OBPRQ 399.78 MHz  
 OBSET 4.19 kHz  
 OBRIN 7.29 Hz  
 POINT 52428  
 PRSQ 6602.40 Hz  
 SCANS 8  
 ACQTM 8.7346 sec  
 PD 5.0000 sec  
 PW 4.91 usec  
 IRNUC 1H  
 CTMP 23.8 c  
 SLVNT DMSO  
 EXREP 0.00 ppm  
 BP 0.12 Hz  
 RGAIN 60

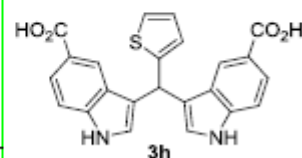

single pulse decoupled gated NOE

M-1953-154-2,Carbon-1-1.als

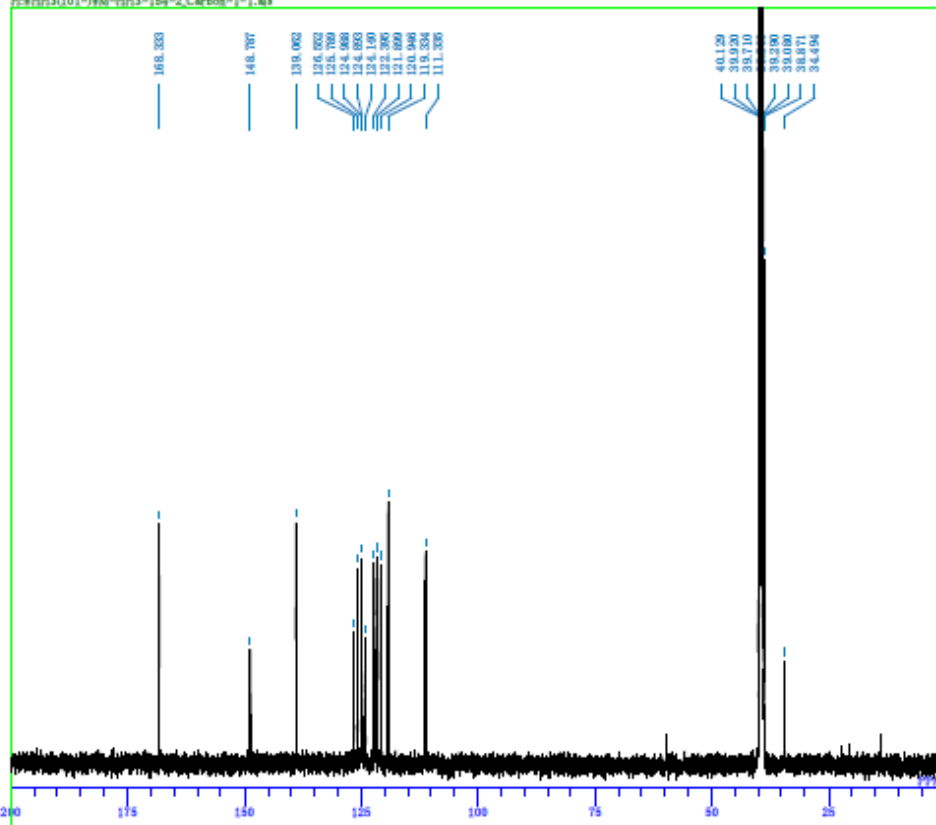

DPFILE M-1953-154-2,Carbon-1-1.als  
 COMMENT single pulse decoupled gated NOE  
 DATIM 23-05-2012 06:11:23  
 OBNUC 13C  
 EXMOD carbon\_jap  
 OBPRQ 101.53 MHz  
 OBSET 5.35 kHz  
 OBRIN 5.86 Hz  
 POINT 26214  
 PRSQ 26125.43 Hz  
 SCANS 1024  
 ACQTM 1.0433 sec  
 PD 2.0000 sec  
 PW 2.67 usec  
 IRNUC 13C  
 CTMP 23.6 c  
 SLVNT DMSO  
 EXREP 39.80 ppm  
 BP 1.20 Hz  
 RGAIN 60

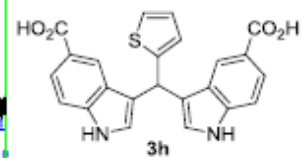

Figure 7S. Cont.

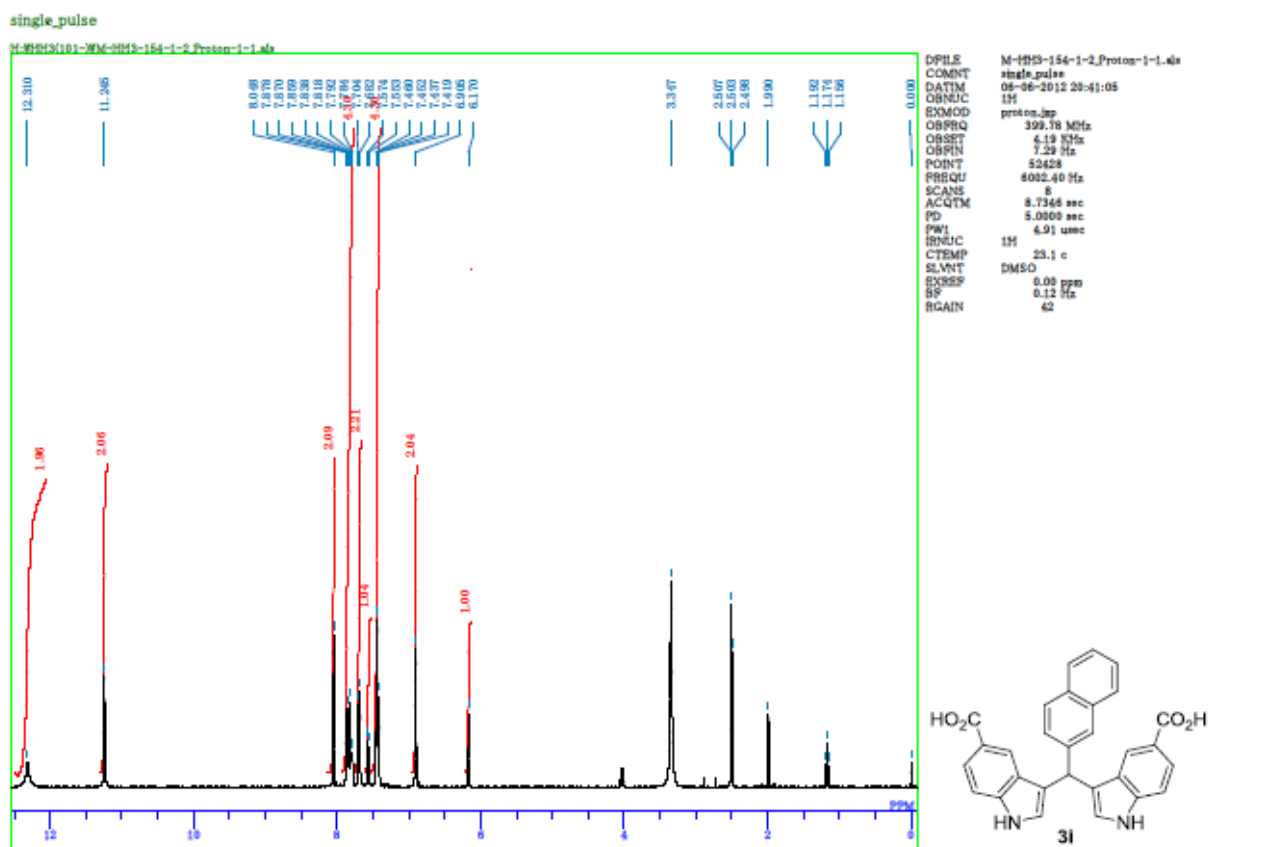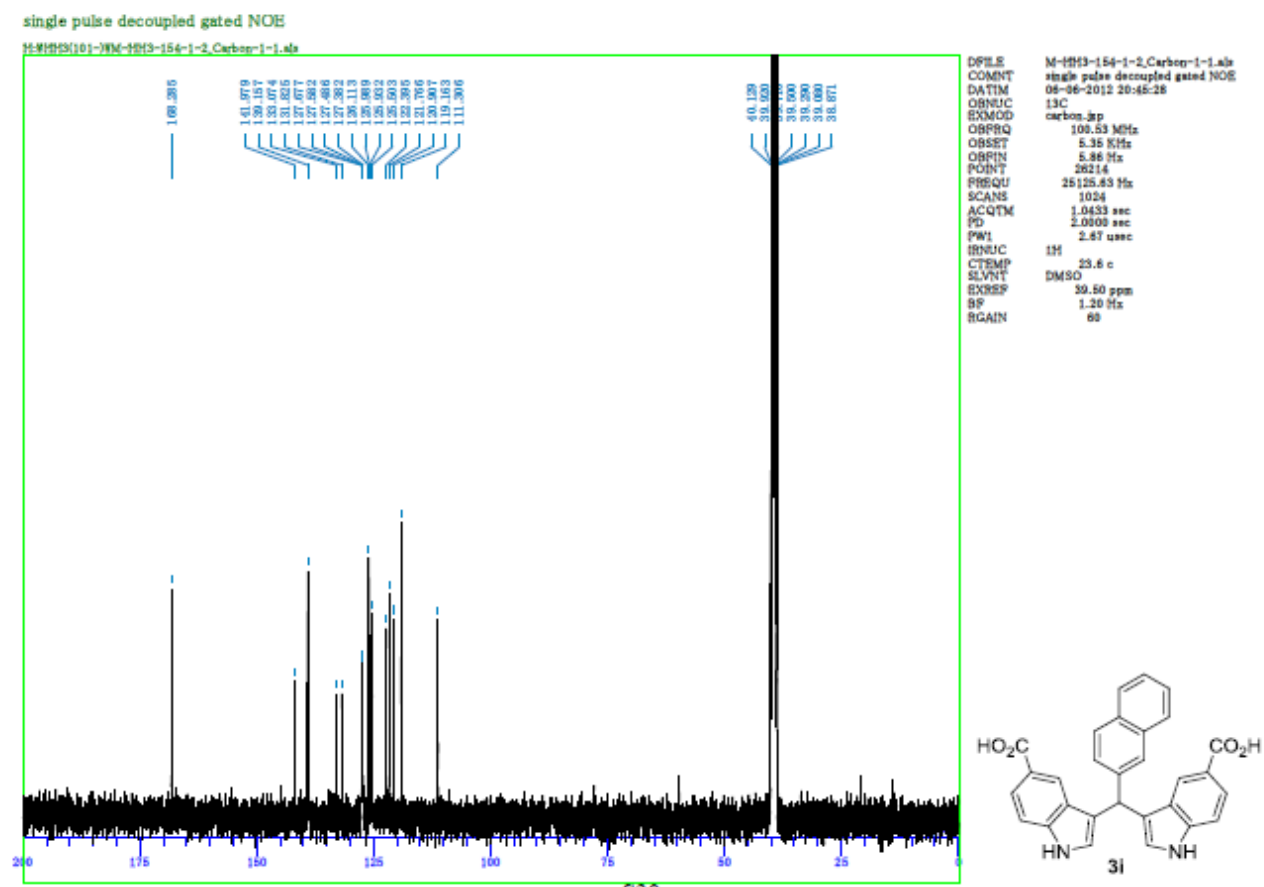

Figure 7S. Cont.

single\_pulse

M-1013(101)-MM-1013-152-4,Proton-1-1.ac

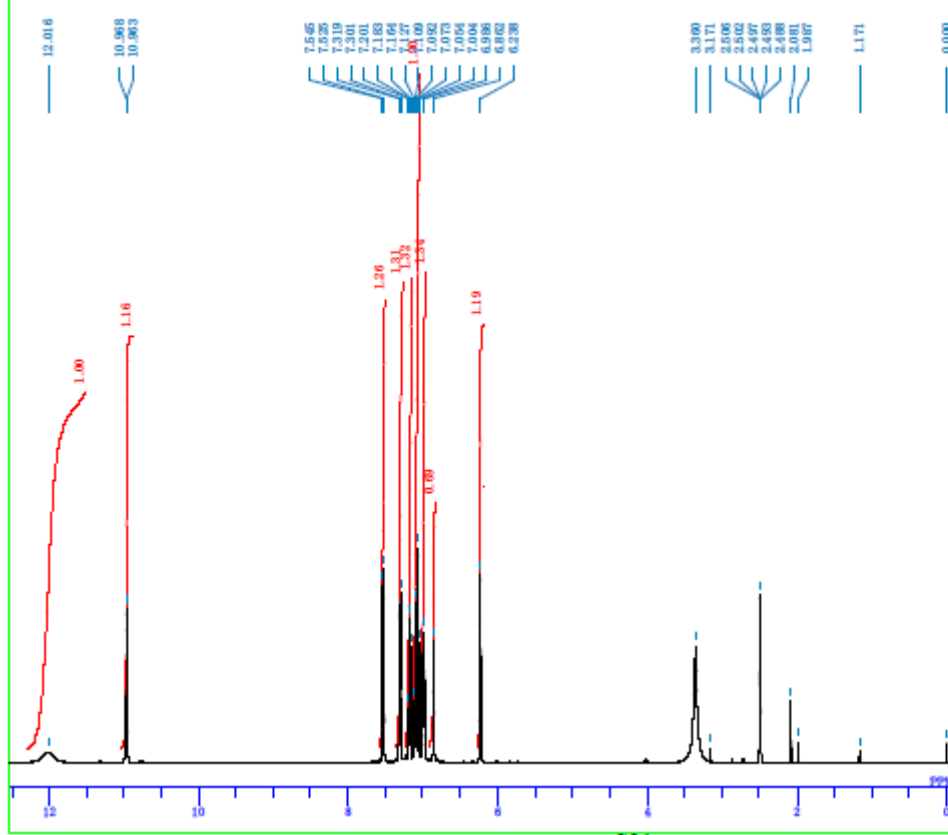

DPFILE M-1013-152-4,Proton-1-1.ac  
 COMNT single\_pulse  
 DATIM 24-05-2012 01:16:49  
 ORNUC 1H  
 EXMOD proton\_jap  
 OBPRQ 399.78 MHz  
 OBSRT 4.19 KHz  
 OBSFN 7.29 Hz  
 POINT 52428  
 PRBQU 6002.40 Hz  
 SCANS 8  
 ACQTM 8.7346 sec  
 PD 5.0050 sec  
 PW1 4.91 usec  
 IRNUC 1H  
 CTEMP 22.8 c  
 SLVNT DMSO  
 EXREF 0.00 ppm  
 SF 0.12 Hz  
 RGAIN 38

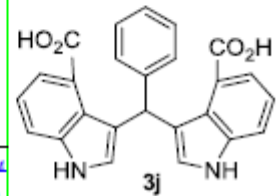

single pulse decoupled gated NOE

M-1013(101)-MM-1013-152-4,Carbon-1-1.ac

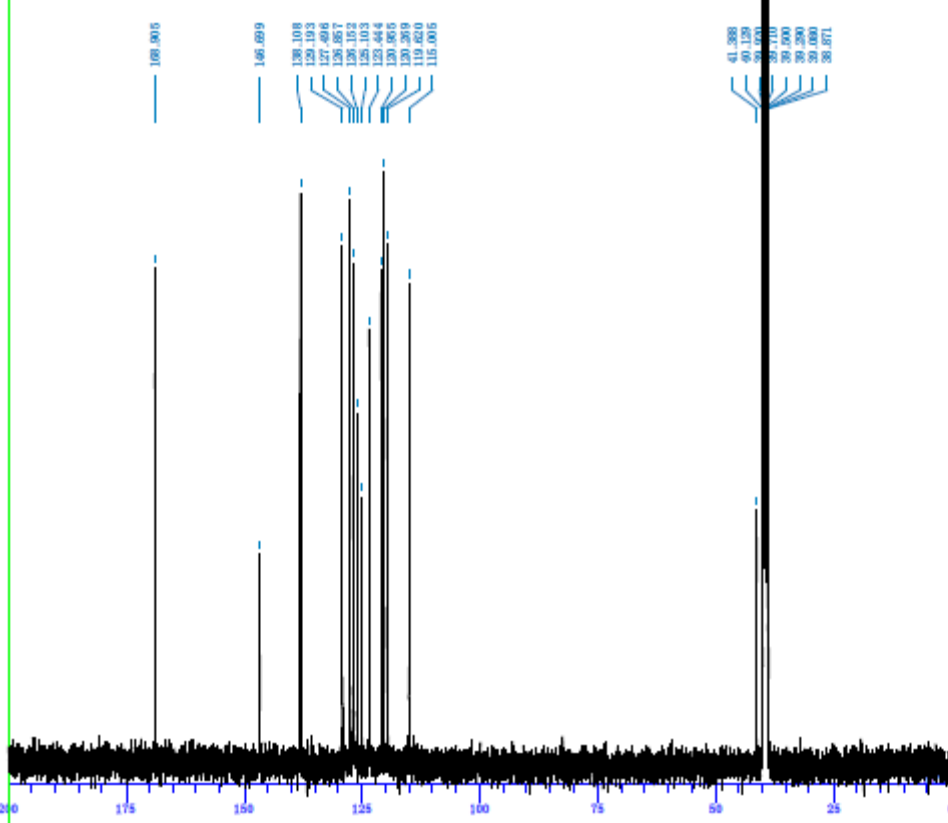

DPFILE M-1013-152-4,Carbon-1-1.ac  
 COMNT single pulse decoupled gated NOE  
 DATIM 24-05-2012 01:21:17  
 ORNUC 13C  
 EXMOD carbon\_jap  
 OBPRQ 100.63 MHz  
 OBSRT 5.55 KHz  
 OBSFN 5.86 Hz  
 POINT 26214  
 PRBQU 25125.63 Hz  
 SCANS 1024  
 ACQTM 1.0433 sec  
 PD 2.0505 sec  
 PW1 2.67 usec  
 IRNUC 1H  
 CTEMP 22.5 c  
 SLVNT DMSO  
 EXREF 39.50 ppm  
 SF 1.20 Hz  
 RGAIN 60

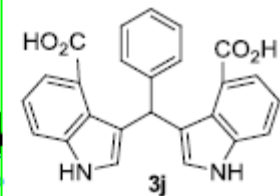

Figure 7S. Cont.

single\_pulse

M-1919-152-1-2.Proton-1-1.a

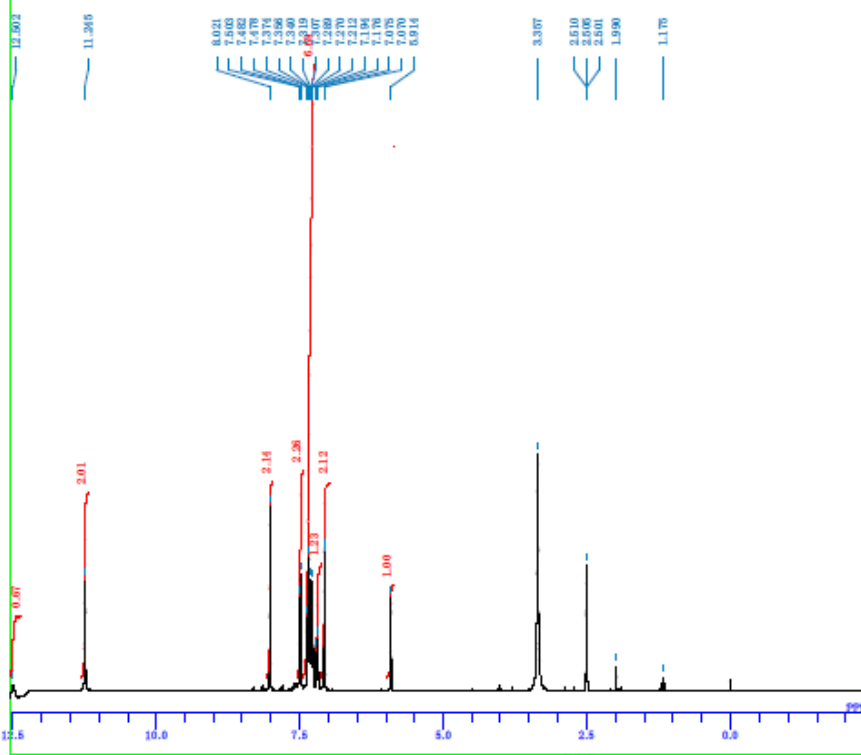

DFILE M-1919-152-1-2.Proton-1-1.a  
 COMNT single\_pulse  
 DATIM 06-06-2012 22:43:32  
 OBNUC 1H  
 EXMOD proton\_jmp  
 OSFRQ 392.76 MHz  
 OBSST 4.19 KHz  
 OBRIN 7.20 Hz  
 POINT 52428  
 PRFQI 6002.40 Hz  
 SCANS 8  
 ACQTM 8.7246 sec  
 PD 5.0000 sec  
 PWT 4.91 usec  
 IRNUC 1H  
 CTEMP 22.4 c  
 SLVNT DMSO  
 EXREF 0.00 ppm  
 SF 0.12 Hz  
 RGAIN 42

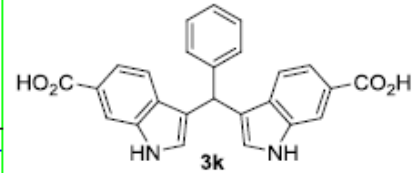

single pulse decoupled gated NOE

M-1919-152-1-2.Carbon-1-1.a

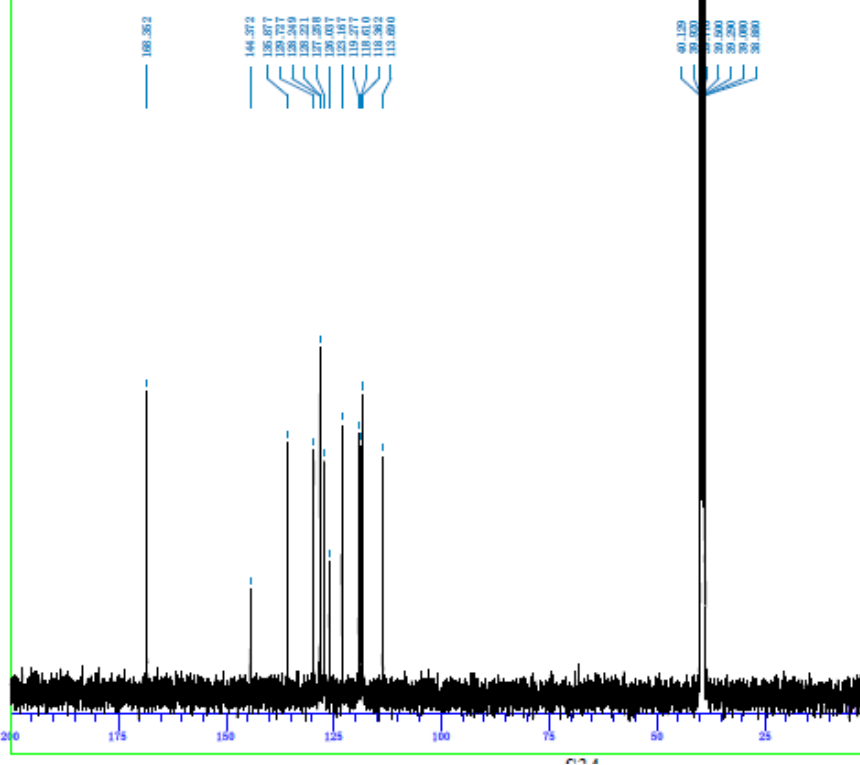

DFILE M-1919-152-1-2.Carbon-1-1.a  
 COMNT single pulse decoupled gated NOE  
 DATIM 06-06-2012 22:47:56  
 OBNUC 13C  
 EXMOD carbon\_jmp  
 OSFRQ 100.63 MHz  
 OBSST 5.35 KHz  
 OBRIN 5.98 Hz  
 POINT 26214  
 PRFQI 25125.63 Hz  
 SCANS 1024  
 ACQTM 1.0433 sec  
 PD 2.0000 sec  
 PWT 2.67 usec  
 IRNUC 13H  
 CTEMP 23.6 c  
 SLVNT DMSO  
 EXREF 39.50 ppm  
 SF 1.33 Hz  
 RGAIN 60

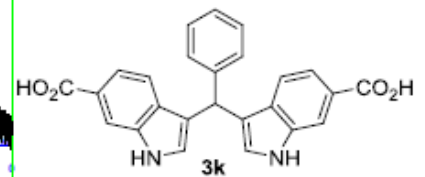

Figure 7S. Cont.

single\_pulse

M-1013(101)-NM-1013-162-1-2,Proton-1-1.ac

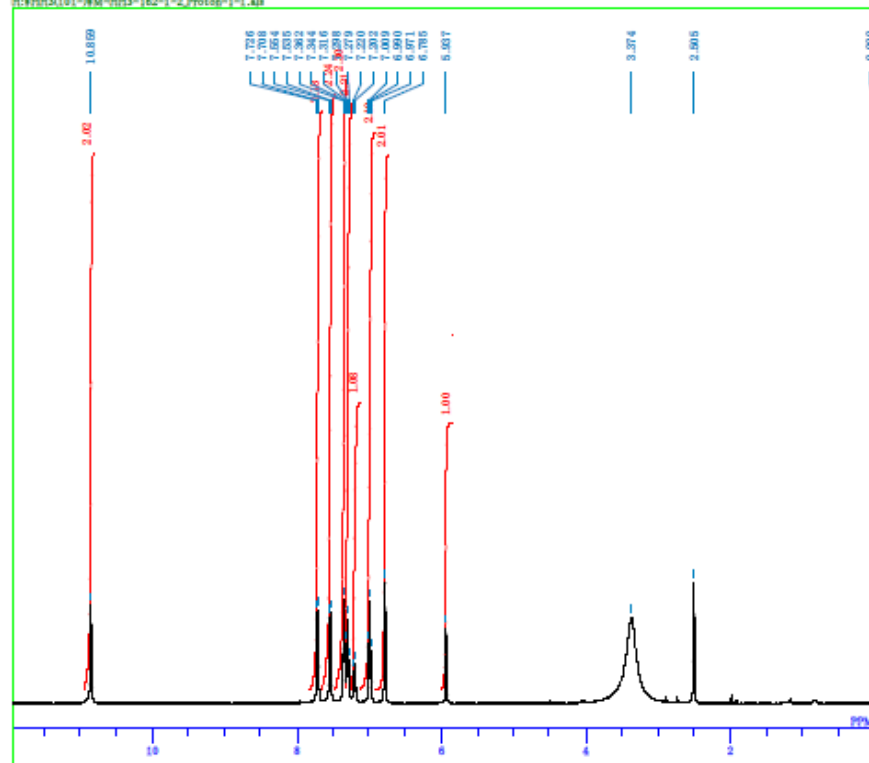

DFILE M-1013-162-1-2,Proton-1-1.ac  
 COMNT single\_pulse  
 DATIM 06-08-2012 23:44:54  
 1H  
 OBNDC  
 EXMOD proton\_1p  
 OBPPO 399.78 MHz  
 OBSST 4.19 KHz  
 OBSPT 7.29 Hz  
 POINT 52428  
 PREQU 6062.40 Hz  
 SCANS 8  
 ACQTM 8.7546 sec  
 PD 5.8000 sec  
 PW1 4.91 usec  
 BRNLC 1H  
 CTEMP 22.2 c  
 SLVNT DMSO  
 EXHRP 0.00 ppm  
 SF 0.12 Hz  
 RGAIN 40

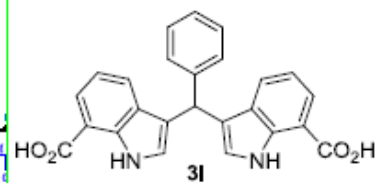

single pulse decoupled gated NOE

M-1013(101)-NM-1013-162-1-2,Carbon-1-1.ac

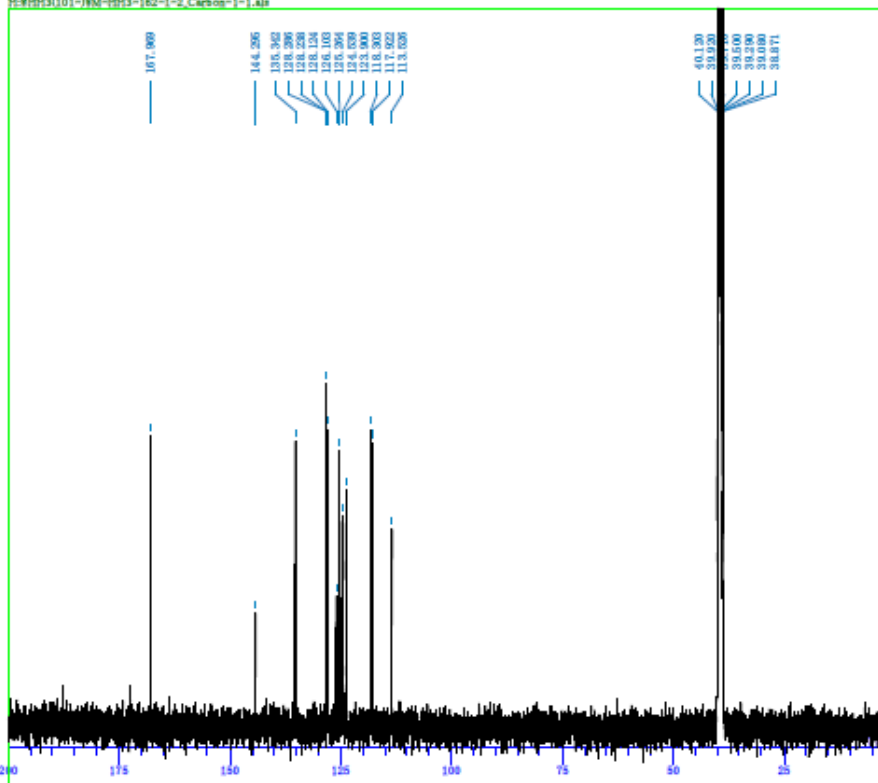

DFILE M-1013-162-1-2,Carbon-1-1.ac  
 COMNT single pulse decoupled gated NOE  
 DATIM 06-08-2012 23:49:17  
 13C  
 carbon\_1p  
 OBPPO 100.63 MHz  
 OBSST 5.35 KHz  
 OBSPT 5.86 Hz  
 POINT 32767  
 PREQU 31407.84 Hz  
 SCANS 1024  
 ACQTM 1.0433 sec  
 PD 2.0000 sec  
 PW1 2.67 usec  
 BRNLC 1H  
 CTEMP 22.4 c  
 SLVNT DMSO  
 EXHRP 39.50 ppm  
 SF 1.20 Hz  
 RGAIN 40

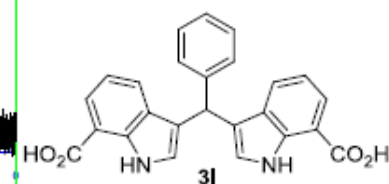

Figure 7S. Cont.

single\_pulse

M-HHS(101)-NM-HHS-157-1-2,Proton-1-1.als

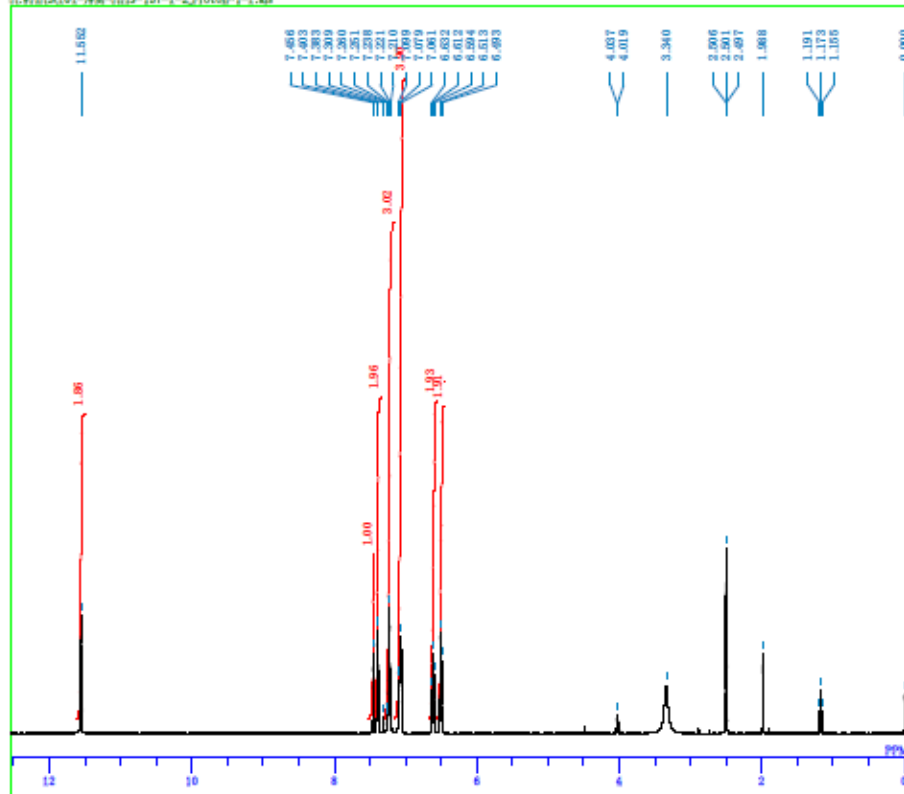

DFILE M-HHS-157-1-2,Proton-1-1.als  
 COMENT single\_pulse  
 DATIM 06-06-2012 19:59:27  
 OSNUC 1H  
 EXMOD proton\_jnp  
 OSFPRQ 399.78 MHz  
 OSSET 4.19 KHz  
 OSFPIV 7.29 Hz  
 POINT 52433  
 PRSQQU 6002.40 Hz  
 SCANS 8  
 ACQTM 8.7346 sec  
 PD 5.0000 sec  
 FW1 4.91 usec  
 ISNUC 1H  
 CTMP 22.5 c  
 SLVNT DMSO  
 EXRFP 0.00 ppm  
 SF 0.12 Hz  
 RGAIN 46

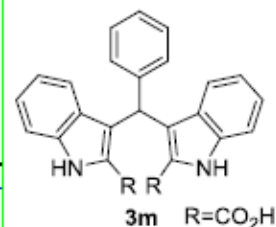

single pulse decoupled gated NOES

M-HHS(101)-NM-HHS-157-1-2,Carbon-1-1.als

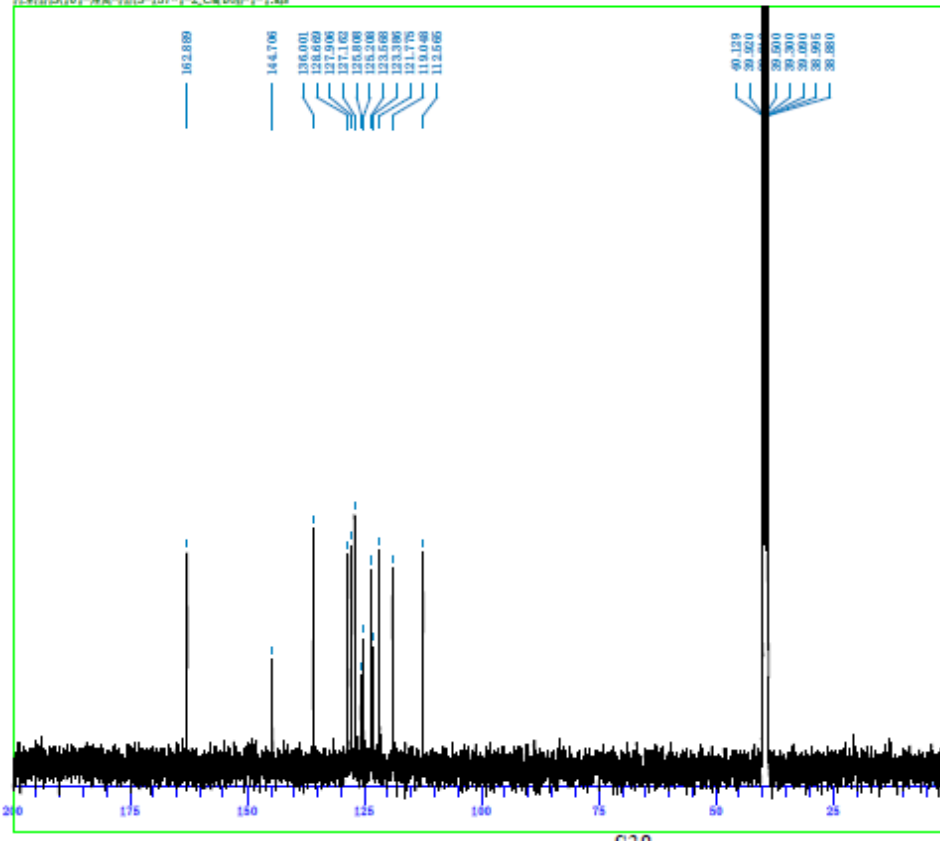

DFILE M-HHS-157-1-2,Carbon-1-1.als  
 COMENT single\_pulse decoupled gated NOES  
 DATIM 06-06-2012 19:43:52  
 OSNUC 13C  
 EXMOD carbon\_jnp  
 OSFPRQ 100.53 MHz  
 OSSET 5.35 KHz  
 OSFPIV 5.88 Hz  
 POINT 24214  
 PRSQQU 25125.63 Hz  
 SCANS 1024  
 ACQTM 1.0433 sec  
 PD 2.0000 sec  
 FW1 2.67 usec  
 ISNUC 1H  
 CTMP 22.9 c  
 SLVNT DMSO  
 EXRFP 39.50 ppm  
 SF 1.20 Hz  
 RGAIN 60

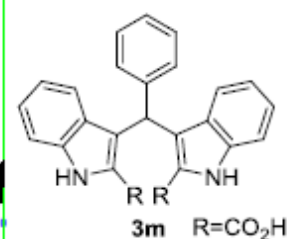

Figure 7S. Cont.

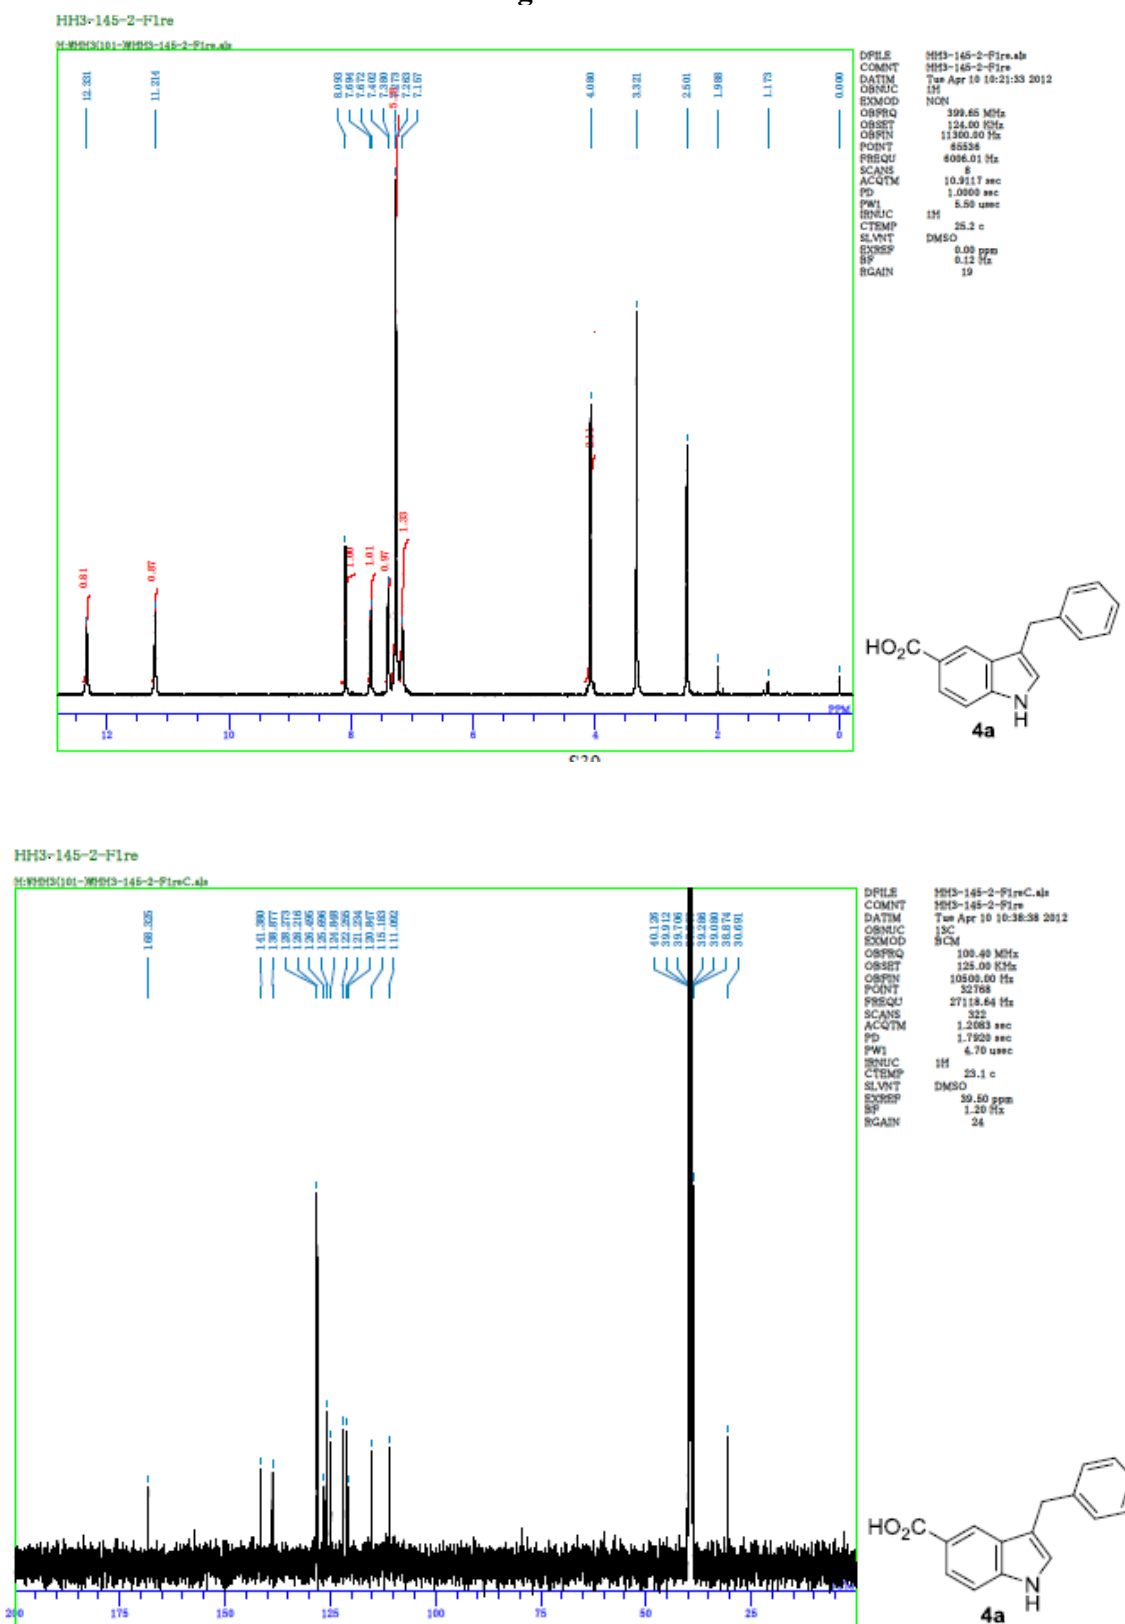

Supplement: s1 [file s1]
